# Supplementary material
Source: PubMed Central journal article supplement (PMC6647953)
Supplement: ao8b03532_si_001.pdf [file ao8b03532_si_001.pdf]

Supporting Information for:

**Alginate Trisaccharide Binding Sites on the Surface of  $\beta$ -Lactoglobulin Identified by NMR Spectroscopy - Implications for Molecular Network Formation**

Emil G. P. Stender,<sup>§,||</sup> Johnny Birch,<sup>§,||</sup> Christian Kjeldsen,<sup>†</sup> Lau D. Nielsen,<sup>‡</sup> Jens Ø. Duus,<sup>†</sup> Birthe B. Kragelund,<sup>‡\*</sup> and Birte Svensson<sup>§\*</sup>

<sup>§</sup>Enzyme and Protein Chemistry, Department of Biotechnology and Biomedicine, Technical University of Denmark, Søtofts Plads, building 224, DK-2800 Kgs. Lyngby, Denmark

<sup>†</sup>Department of Chemistry, Technical University of Denmark, Kemitorvet, building 207, DK-2800 Kgs. Lyngby, Denmark

<sup>‡</sup>Structural Biology and NMR Laboratory, Linderstrøm-Lang Centre for Protein Science, Department of Biology, University of Copenhagen, Ole Maaløes Vej 5, DK-2100 Copenhagen Ø, Denmark

<sup>||</sup>These authors contributed equally

\*Corresponding authors: Birte Svensson, E-mail: bis@bio.dtu.dk; phone: +4545252740; Birthe B. Kragelund, E-mail: bbk@bio.ku.dk; phone: +45 3532 2081

### Primary structure of BLGA.

1            10            20            30            40            50            60  
EAEAYVTQTMKGLDIQKVAGTWYSLAMAASDISLLDAQSAPLRVYVEELKPTPEGDLEILLQKWEN  
70            80            90            100            110            120  
DECAQKKIIAEKTKIPAVFKIDALNENKVLVLDTDYKKYLLFCMENSAEPEQSLVCQCLVRTPEVD  
130            140            150            160  
DEALEKFDKALKALPMHIRLSFNPTQLEEQCHI

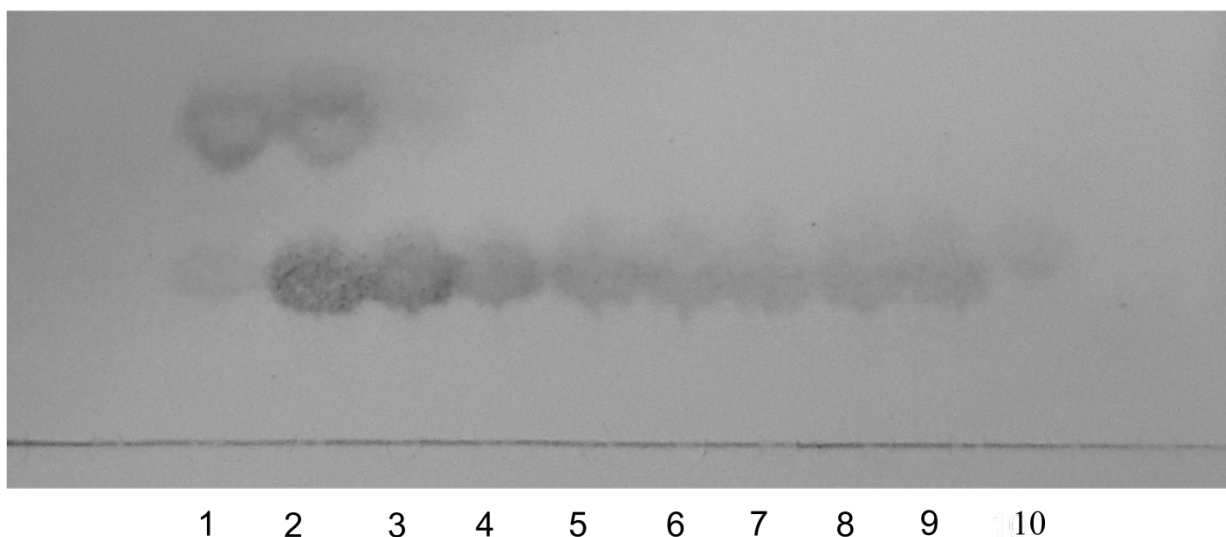

Supporting Figure S1. Top: Primary structure of the BLGA used in the current work. Three cloning residues (EAE) and two mutations (LI->AY) of residues 1 and 2 are included, just at V105 appear as F105 to match the NMR assignments of Uhrínová et al. (ref 7). The numbering this adds +3 to the sequences, such that F105 becomes F108 when the 3 N-terminal residues are considered.

Bottom: TLC of AOSs purification (see Methods). Numbers represent individual fractions from the HPLC chromatogram. The upper spot represent the disaccharide and the lower the trisaccharides

products.

### Structure determination of alginate oligosaccharides (AOSs)

AOS structures were determined by NMR spectroscopy (Bruker Avance III (799.90 MHz for  $^1\text{H}$  and 201.14 MHz for  $^{13}\text{C}$ ) equipped with a 5 mm TCI  $^1\text{H}/(^{13}\text{C}, ^{15}\text{N})$  cryoprobe using 4,4-dimethyl-4-silapentane-1-sulfonic acid as reference ( $-0.093$  ppm for  $^1\text{H}$  and  $-2.76$  ppm for  $^{13}\text{C}$ ). Chemical shifts were assigned using 1D  $^1\text{H}$  with presaturation, 1D  $^{13}\text{C}$ , 2D double quantum filter correlated spectroscopy (DQF-COSY), 2D Rotating frame nuclear Overhauser effect spectroscopy (ROESY), 2D  $^{13}\text{C}$  heteronuclear single quantum coherence (HSQC) with multiplicity editing, 2D  $^{13}\text{C}$  HSQC- $[\text{H},^1\text{H}]$  total correlation spectroscopy (HSQC-TOSCY) with 60 ms mixing time, 2D  $^{13}\text{C}$  heteronuclear multi-bond correlation (HMBC) optimized for 10 Hz long range coupling constants and CLIP-HSQC. All spectra were recorded at 298 K using TopSpin 3.5 and processed and analysed (TopSpin 3.5 software; Bruker).

The  $^1\text{H}$ ,  $^{13}\text{C}$  HSQC NMR spectrum of the AOSs revealed seven distinct peaks corresponding to anomeric positions of monosaccharide units labelled **A-G** in order of descending anomeric  $^{13}\text{C}$  chemical shift (Table S1), which were assigned to the individual monosaccharide units using DQF-COSY, ROESY, HSQC-TOCSY and HMBC. The anomeric configuration was determined using  $^1J_{\text{H1,C1}}$  coupling constants<sup>35</sup> obtained using CLIP-HSQC.<sup>36</sup> **F** and **G** being from a reducing end and not of mannose configuration. Instead they were of gulose configuration assigned from the 8.4 Hz  $^3J_{\text{H,H}}$  coupling constant between the anomeric proton and the C2-proton. Anomeric signals **A** and **E** were of lower intensity than the other five and corresponded to a central mannuronic acid linked to a reducing end guluronic acid in  $\alpha/\beta$  configuration. Signal **B** was from the central guluronic acid; CLIP-HSQC showing the anomeric proton to be equatorial, and as the  $^3J_{\text{H3,H4}}$  coupling constant was 3.6 Hz, this was in  $\alpha$ -configuration. Signal **C** was from the non-reducing end contained a double

bond between C4 and C5 and signal **D** was from an almost identical unit as **C**, hence at a non-reducing end containing a double bond. The differences between **C** and **D** stems from whether they were attached to a guluronic acid or a mannuronic acid residue.<sup>37</sup> **E** and **F** were from the remaining anomeric positions of  $\alpha$ - and  $\beta$ -guluronic acid reducing ends. Using HMBC and ROESY experiments all connections between monosaccharides were determined to be 1,4-linkages. In conclusion, the purified AOSs of DP 3 were the trisaccharides, (4-deoxy- $\alpha$ -L-erythro-hex-4-enopyranosyluronate)-(1,4)-( $\alpha$ -L-gulopyranosyluronate)-(1,4)-(L-gulopyranosyluronate) (**1**, 75% major component) and (4-deoxy- $\alpha$ -L-erythro-hex-4-enopyranosyluronate)-(1,4)-( $\beta$ -D-mannopyranosyluronate)-(1,4)-(L-gulopyranosyluronate) (**2**, 25%, minor product), depicted in Figure 2.

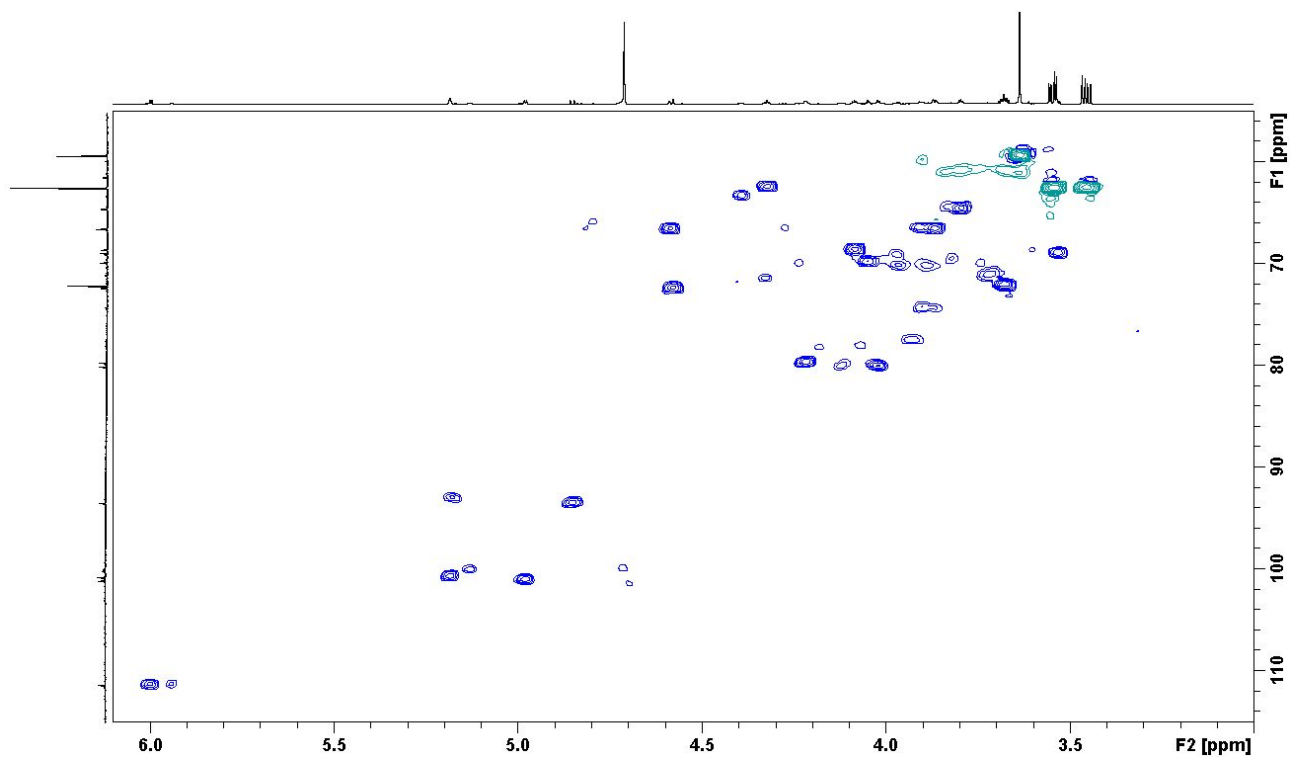

Supporting Figure S2. HSQC spectrum of the AOS sample. The projections are from separate experiments.

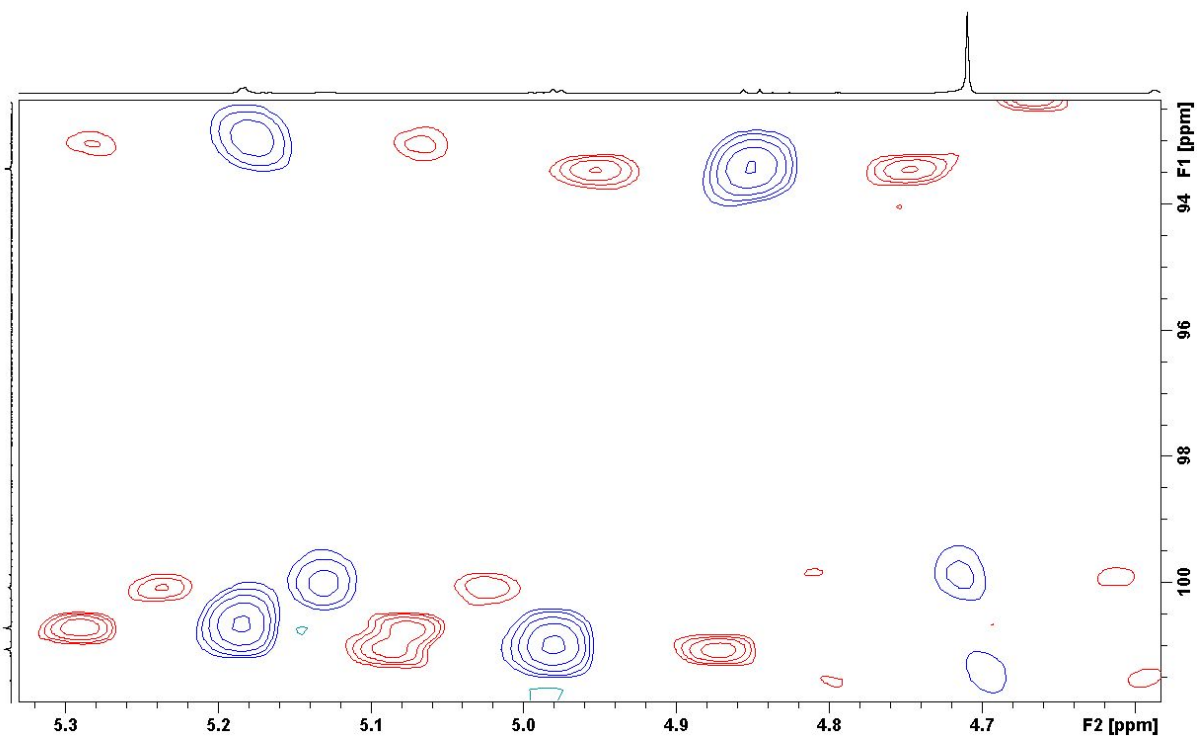

Supporting Figure S3. HSQC spectrum (blue) with the CLIP-HSQC spectrum (red) of the AOS sample overlaid, zoomed to the anomeric position. The projections are from separate experiments.

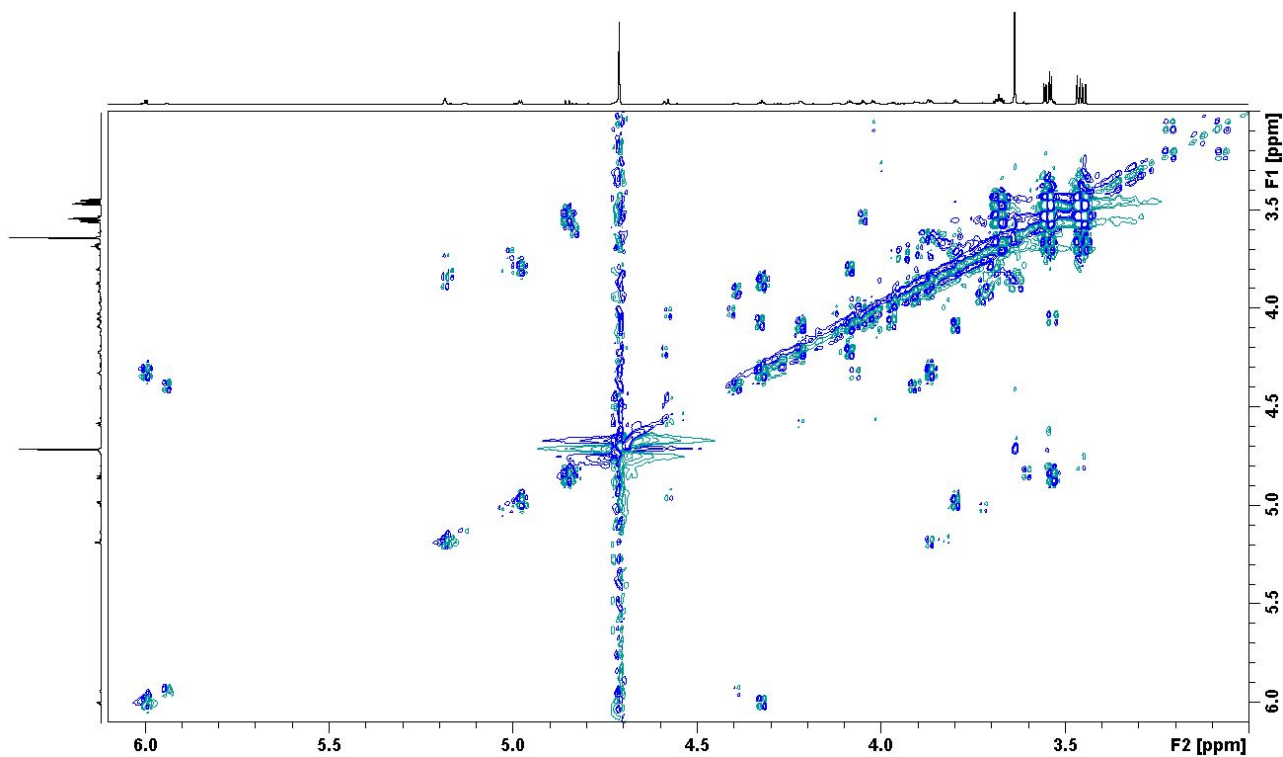

Supporting Figure S4. DQC-COSY spectrum of the AOS sample. The projections are from separate experiments.

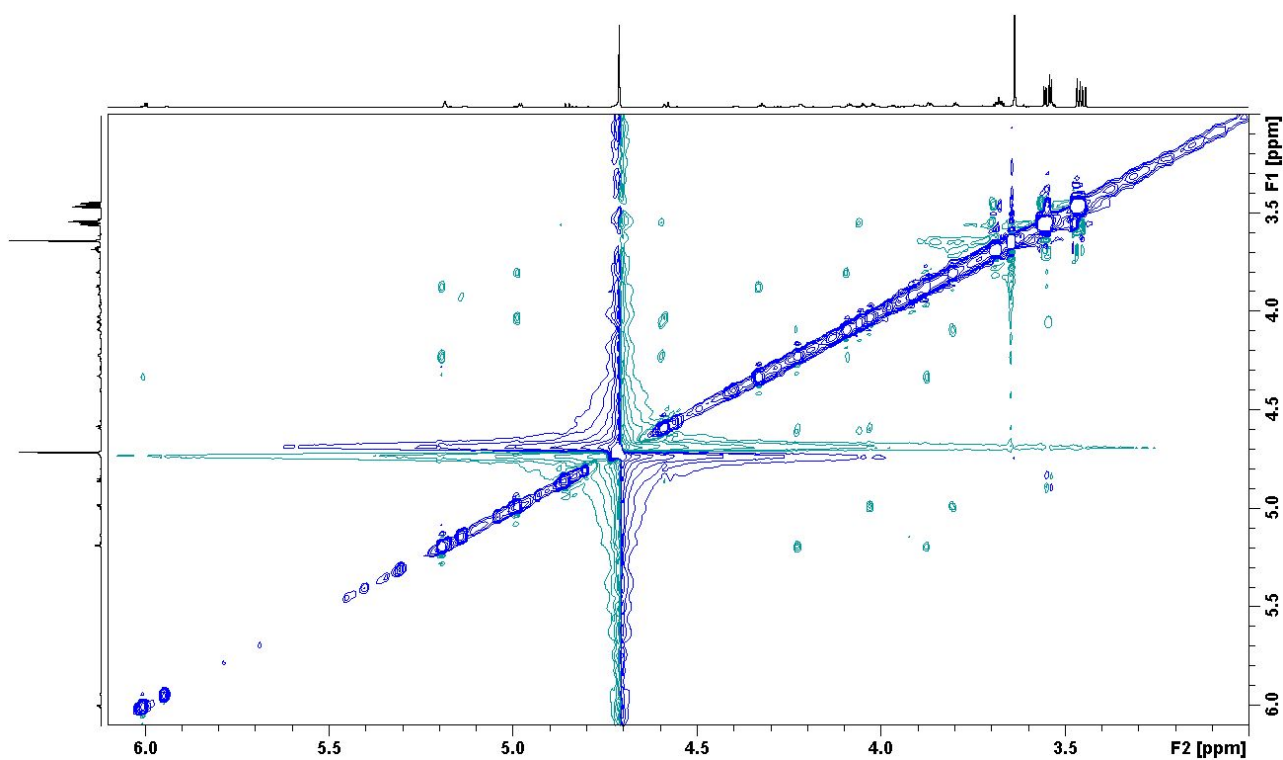

Supporting Figure S5. ROESY spectrum of the AOS sample. The projections are from separate experiments.

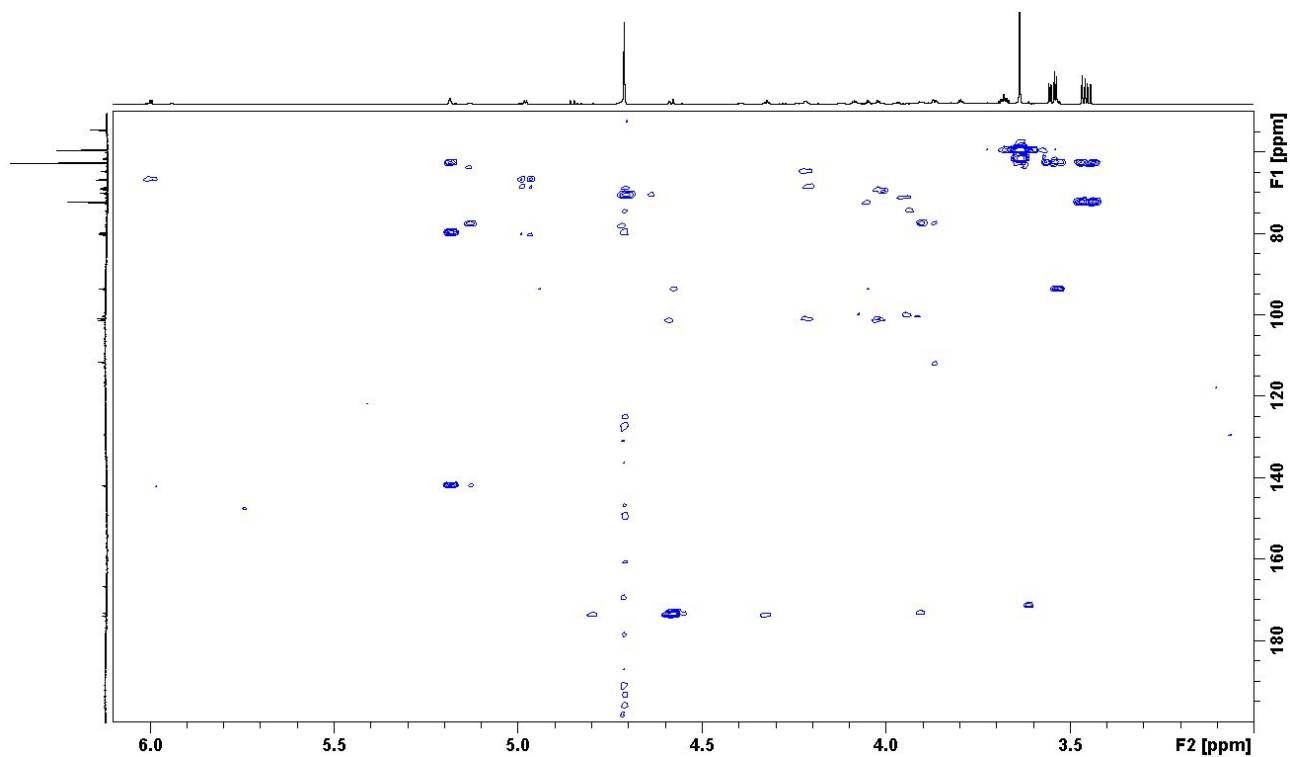

Supporting Figure S6. HMBC spectrum of the AOS sample. The projections are from separate experiments.

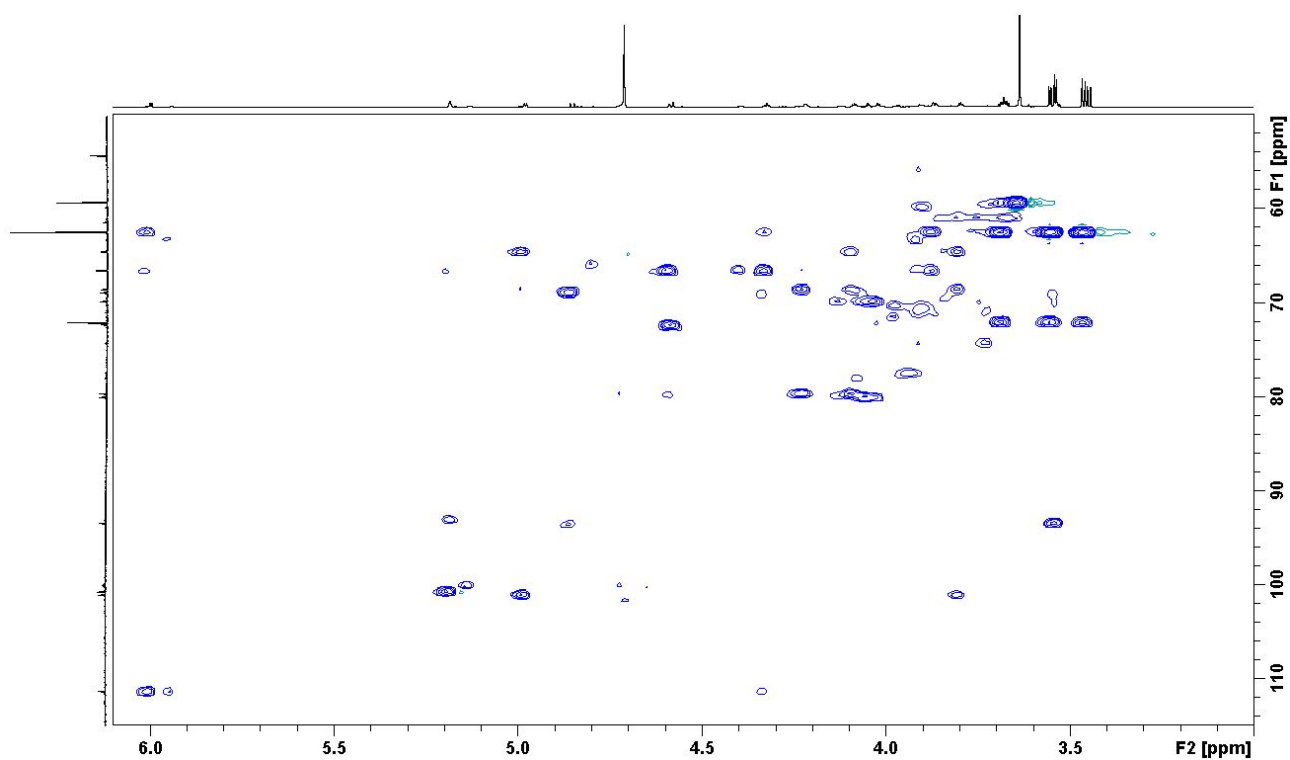

Supporting Figure S7. HSQC-TOCSY spectrum of the AOS sample. The projections are from separate experiments.

Supporting Table S1. NMR assignment of the two trisaccharides. NA means not applicable and ND means non detectable.

| <b>1<math>\beta</math></b>  | <b><math>^1J_{H1,C1}</math></b> | 1      | 2     | 3     | 4      | 5      | 6    |
|-----------------------------|---------------------------------|--------|-------|-------|--------|--------|------|
| Term                        | 171 hz                          | 5.185  | 3.867 | 4.322 | 5.995  | NA     | NA   |
| <b>C</b>                    |                                 | 100.73 | 66.43 | 62.35 | 111.29 | 141.73 | ND   |
| GulA mid                    | 171 hz                          | 4.978  | 3.798 | 4.086 | 4.217  | 4.586  | NA   |
| <b>B</b>                    |                                 | 101.01 | 64.45 | 68.55 | 79.55  | 66.46  | ND   |
| b-GulA red                  | 164 hz                          | 4.856  | 3.534 | 4.049 | 4.02   | 4.577  | NA   |
| <b>F</b>                    |                                 | 93.57  | 68.87 | 69.78 | 79.99  | 72.28  | ND   |
| <b>1<math>\alpha</math></b> | <b><math>^1J_{H1,C1}</math></b> | 1      | 2     | 3     | 4      | 5      | 6    |
| Term                        | 171 hz                          | 5.185  | 3.867 | 4.322 | 5.995  | NA     | NA 0 |
| <b>C</b>                    |                                 | 100.73 | 66.43 | 62.35 | 111.29 | 141.73 |      |
| GulA mid                    | 171 hz                          | 4.978  | 3.798 | 4.086 | 4.217  | 4.586  | NA   |
| <b>B</b>                    |                                 | 101.01 | 64.45 | 68.55 | 79.55  | 66.46  | ND   |
| a-GulA red                  | 172 hz                          | 5.18   | 3.823 | 0     | 4.123  | 4.794  | NA   |
| <b>G</b>                    |                                 | 93.03  | 69.39 | 0     | 79.97  | 65.86  | ND   |
| <b>2<math>\beta</math></b>  | <b><math>^1J_{H1,C1}</math></b> | 1      | 2     | 3     | 4      | 5      | 6    |
| Term                        | 171 hz                          | 5.13   | 3.907 | 4.394 | 5.94   | NA     | NA   |
| <b>D</b>                    |                                 | 99.95  | 66.42 | 63.27 | 111.32 | 141.73 | ND   |
| ManA mid                    | 159 hz                          | 4.717  | 3.968 | 3.726 | 3.935  | 3.904  | NA   |
| <b>E</b>                    |                                 | 99.85  | 70.17 | 71.02 | 77.47  | 74.29  | ND   |
| b-GulA red                  | 164 hz                          | 4.856  | 3.534 | 4.049 | 4.02   | 4.577  | NA   |



|                             |                                 |        |       |       |        |        |    |
|-----------------------------|---------------------------------|--------|-------|-------|--------|--------|----|
| <b>F</b>                    |                                 | 93.57  | 68.87 | 69.78 | 79.99  | 72.28  | ND |
| <b>2<math>\alpha</math></b> | <sup>1</sup> J <sub>H1,C1</sub> | 1      | 2     | 3     | 4      | 5      | 6  |
| Term                        | 171 hz                          | 5.13   | 3.907 | 4.394 | 5.94   | NA     | NA |
| <b>D</b>                    |                                 | 99.95  | 66.42 | 63.27 | 111.32 | 141.73 | ND |
| ManA mid                    | 163 hz                          | 4.696  | 3.972 | 3.726 | 3.935  | 3.87   | NA |
| <b>A</b>                    |                                 | 101.54 | 69.05 | 71.02 | 77.47  | 74.36  | ND |
| a-GulA red                  | 172 hz                          | 5.18   | 3.823 | 0     | 4.123  | 4.794  | NA |
| <b>G</b>                    |                                 | 93.03  | 69.39 | 0     | 79.97  | 65.86  | ND |

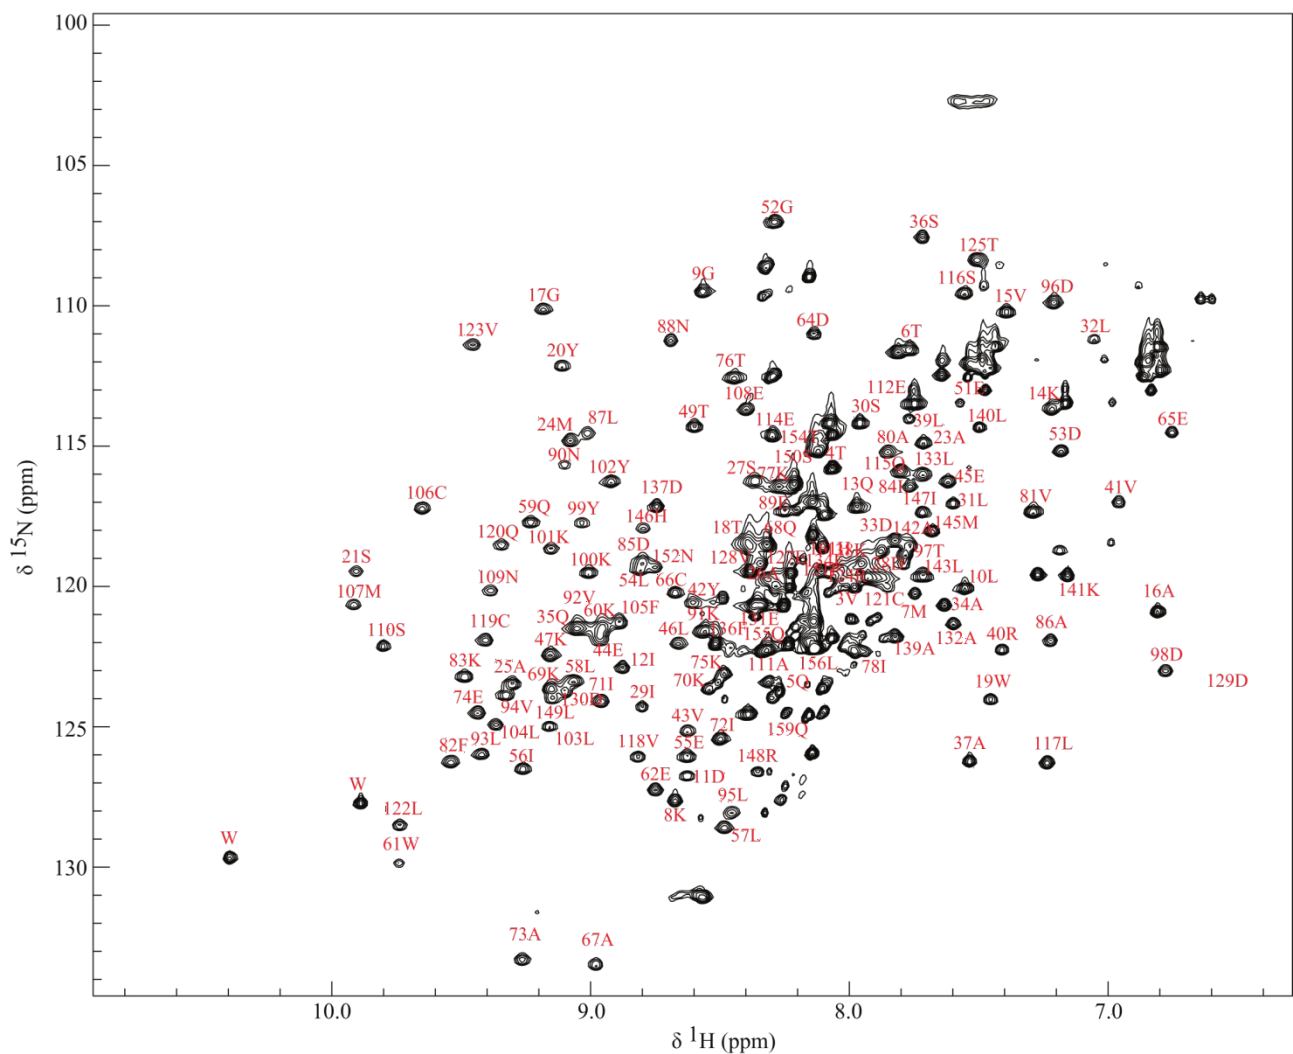

Supporting Figure S8.  $^1\text{H}$   $^{15}\text{N}$  HSQC spectrum and chemical shift assignments of BLGA at pH 2.65

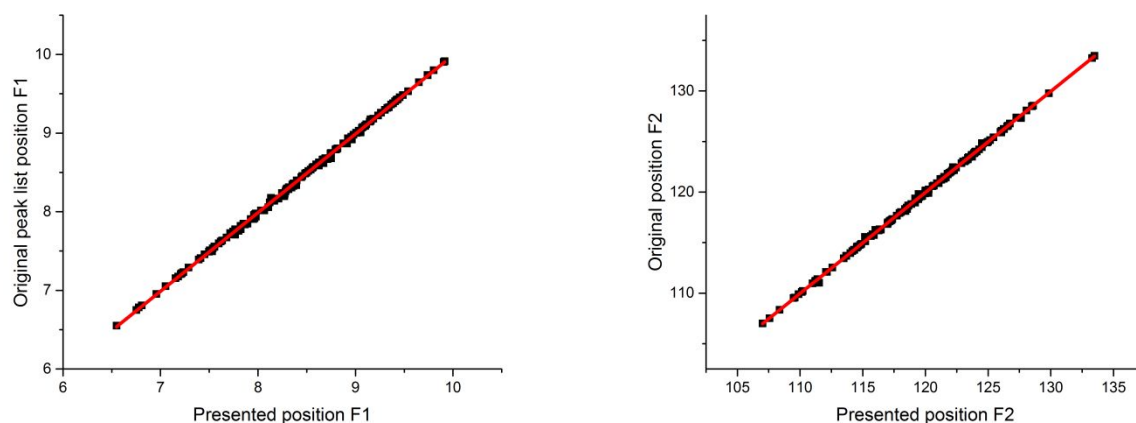

Supporting Figure S9. Assignment of BLGA chemical shifts at pH 2.65. The assigned chemical shifts in this work correlate well ( $R^2=0.9995$ ) with previously published assignments listed in Table 1 of (ref 7).

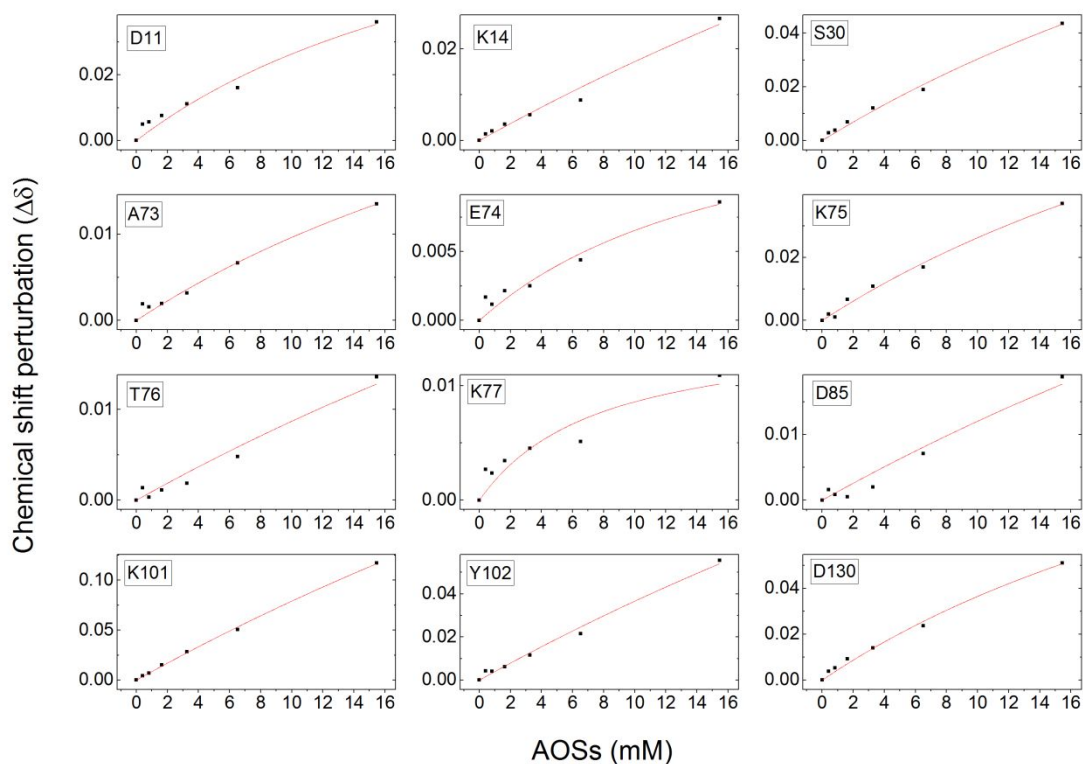

Supporting Figure S10. Fit of classical binding model to chemical shift perturbations as a function

of AOSs concentration. Decent fit is observed for significant chemical shift perturbations e.g. K101, Y102 and K75, while poor fit is observed for chemical shift perturbations below the average plus 1 standard deviation e.g. for K77 (Figure 4).

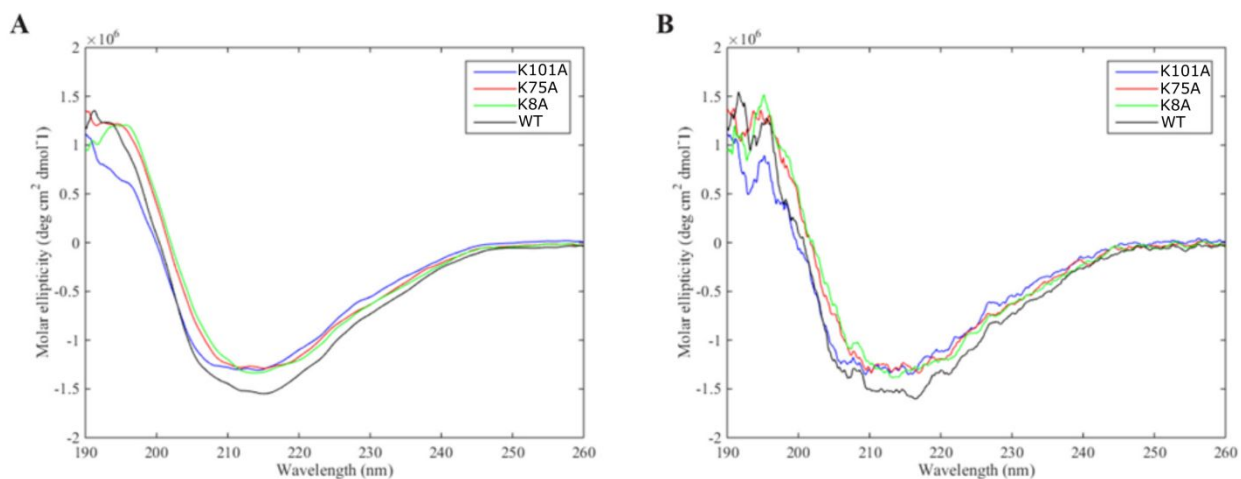

Supporting Figure S11. Far-UV CD spectra of BLGA WT (black), K75A (red), K8A (green) and K101A (blue). A) Fourier transformed spectra B) untreated spectra. For details on the sample see Methods.

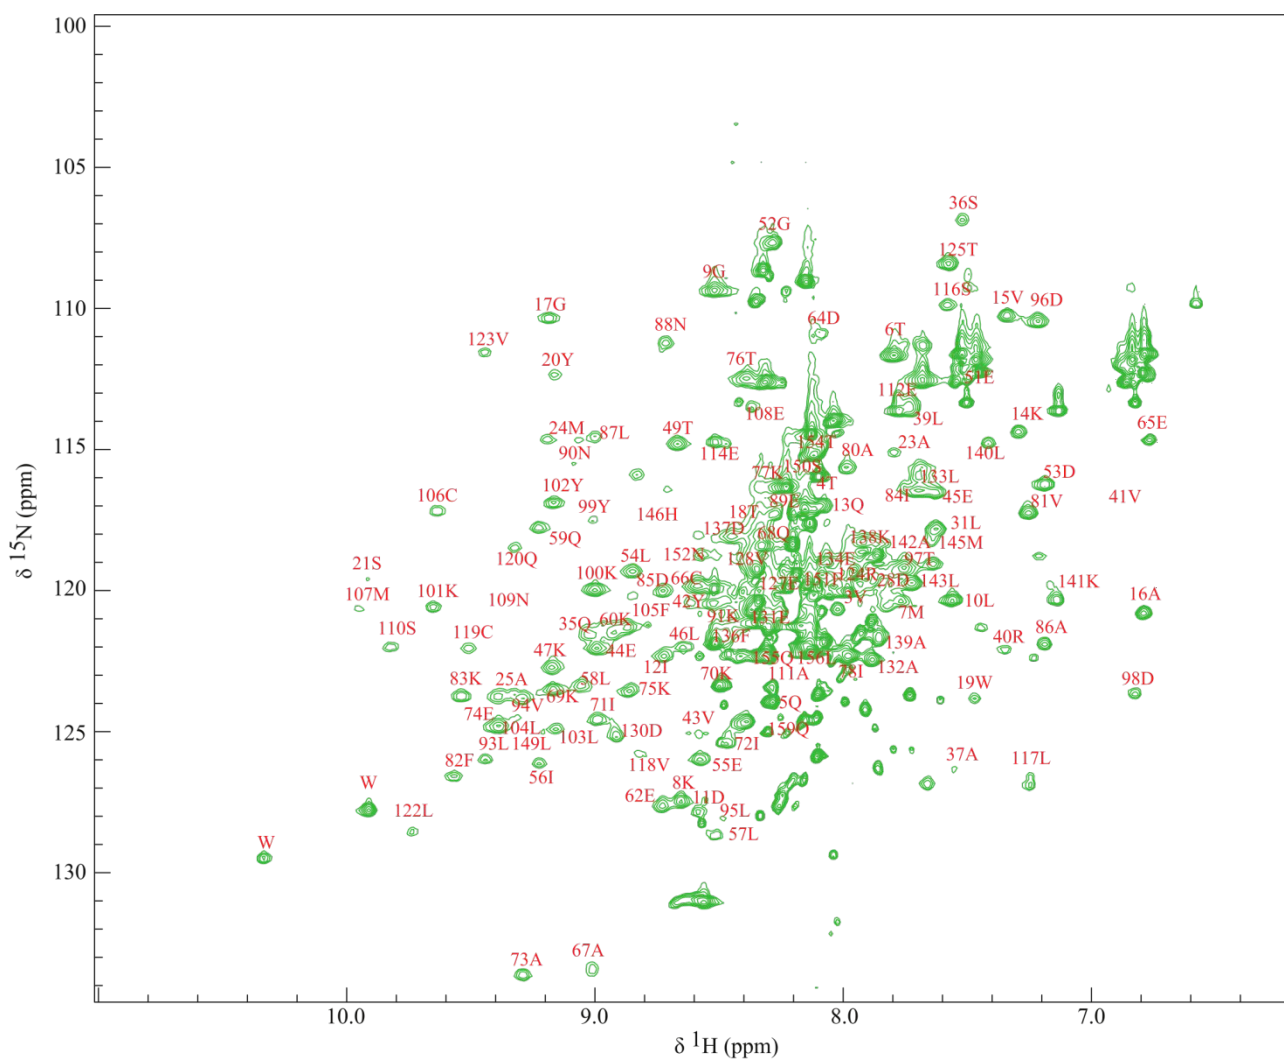

Supporting Figure S12.  ${}^1\text{H}$   ${}^{15}\text{N}$  HSQC spectrum and chemical shift assignments of BLGA at pH 4.0

Supporting Table S2. Assignment of BLGA WT at pH 2.65 and 4.0. For details on sample conditions, see methods (BMRB entry 27668).

| pH 2.65 assignment |             |           |           | pH 4.0 assignment |             |           |           |
|--------------------|-------------|-----------|-----------|-------------------|-------------|-----------|-----------|
| Position F1        | Position F2 | Assign F1 | Assign F2 | Position F1       | Position F2 | Assign F1 | Assign F2 |
| 8.714              | 127.01      | -1AlaH    | -1AlaN    | 8.714             | 127.01      | -1AlaH    | -1AlaN    |
| 8.15643            | 124.5946    | 1AlaH     | 1AlaN     | 8.15249           | 124.60326   | None      | 1AlaN     |
| 7.894              | 116.98      | 2TyrH     | 2TyrN     |                   |             | 2TyrH     | 2TyrN     |

|         |          |        |        |         |           |        |        |
|---------|----------|--------|--------|---------|-----------|--------|--------|
| 7.97976 | 120.0125 | 3ValH  | 3ValN  | 7.98107 | 120.03856 | 3ValH  | 3ValN  |
| 8.06521 | 115.7838 | 4ThrH  | 4ThrN  | 8.09869 | 115.95741 | 4ThrH  | 4ThrN  |
| 8.27049 | 123.7363 | 5GlnH  | 5GlnN  | 8.28391 | 123.95411 | 5GlnH  | 5GlnN  |
| 7.76571 | 111.5255 | 6ThrH  | 6ThrN  | 7.67919 | 111.31498 | 6ThrH  | 6ThrN  |
| 7.74564 | 120.2697 | 7MetH  | 7MetN  | 7.76694 | 120.3676  | 7MetH  | 7MetN  |
| 8.67298 | 127.6449 | 8LysH  | 8LysN  | 8.6534  | 127.46774 | 8LysH  | 8LysN  |
| 8.56641 | 109.4976 | 9GlyH  | 9GlyN  | 8.5181  | 109.36035 | 9GlyH  | 9GlyN  |
| 7.55358 | 120.1035 | 10LeuH | 10LeuN | 7.56091 | 120.36403 | 10LeuH | 10LeuN |
| 8.62551 | 126.7537 | 11AspH | 11AspN | 8.58382 | 127.84335 | 11AspH | 11AspN |
| 8.87636 | 122.891  | 12IleH | 12IleN | 8.72169 | 122.32619 | 12IleH | 12IleN |
| 7.96968 | 117.1562 | 13GlnH | 13GlnN | 8.09266 | 117.00496 | 13GlnH | 13GlnN |
| 7.21671 | 113.686  | 14LysH | 14LysN | 7.29469 | 114.37819 | 14LysH | 14LysN |
| 7.39204 | 110.2285 | 15ValH | 15ValN | 7.34103 | 110.25788 | 15ValH | 15ValN |
| 6.80901 | 120.9193 | 16AlaH | 16AlaN | 6.78999 | 120.80588 | 16AlaH | 16AlaN |
| 9.18302 | 110.1356 | 17GlyH | 17GlyN | 9.18423 | 110.34642 | 17GlyH | 17GlyN |
| 8.39327 | 118.4161 | 18ThrH | 18ThrN | 8.335   | 118.06956 | 18ThrH | 18ThrN |
| 7.4529  | 124.024  | 19TrpH | 19TrpN | 7.47022 | 123.8326  | 19TrpH | 19TrpN |
| 9.11053 | 112.1596 | 20TyrH | 20TyrN | 9.16544 | 112.35702 | 20TyrH | 20TyrN |
| 9.90568 | 119.4652 | 21SerH | 21SerN | 9.91494 | 119.60535 | 21SerH | 21SerN |
| 7.7138  | 114.8999 | 23AlaH | 23AlaN | 7.79469 | 115.09779 | 23AlaH | 23AlaN |
| 9.07795 | 114.8068 | 24MetH | 24MetN | 9.06504 | 114.67118 | 24MetH | 24MetN |
| 9.30156 | 123.4667 | 25AlaH | 25AlaN | 9.323   | 123.69839 | 25AlaH | 25AlaN |
| 8.31501 | 119.7417 | 26AlaH | 26AlaN |         |           | 26AlaH | 26AlaN |
| 8.36407 | 116.245  | 27SerH | 27SerN |         |           | 27SerH | 27SerN |
| 7.86704 | 119.7309 | 28AspH | 28AspN | 7.87439 | 119.58716 | 28AspH | 28AspN |
| 8.80004 | 124.2856 | 29IleH | 29IleN |         |           | 29IleH | 29IleN |
| 7.95915 | 114.1799 | 30SerH | 30SerN |         |           | 30SerH | 30SerN |
| 7.59857 | 117.0407 | 31LeuH | 31LeuN | 7.6256  | 117.82315 | 31LeuH | 31LeuN |
| 7.05274 | 111.2054 | 32LeuH | 32LeuN |         |           | 32LeuH | 32LeuN |
| 7.82273 | 118.3684 | 33AspH | 33AspN |         |           | 33AspH | 33AspN |
| 7.6322  | 120.6785 | 34AlaH | 34AlaN |         |           | 34AlaH | 34AlaN |
| 9.05349 | 121.4988 | 35GlnH | 35GlnN | 9.02323 | 121.55195 | 35GlnH | 35GlnN |
| 7.71685 | 107.569  | 36SerH | 36SerN | 7.52043 | 106.86304 | 36SerH | 36SerN |
| 7.53554 | 126.2455 | 37AlaH | 37AlaN | 7.55159 | 126.31237 | 37AlaH | 37AlaN |
| 7.76613 | 114.0162 | 39LeuH | 39LeuN | 7.71813 | 114.00216 | 39LeuH | 39LeuN |
| 7.41082 | 122.2755 | 40ArgH | 40ArgN | 7.33993 | 122.0839  | 40ArgH | 40ArgN |
| 6.95828 | 117      | 41ValH | 41ValN | 6.93893 | 117.0467  | 41ValH | 41ValN |
| 8.60354 | 120.5741 | 42TyrH | 42TyrN | 8.61541 | 120.42029 | 42TyrH | 42TyrN |
| 8.62631 | 125.1627 | 43ValH | 43ValN | 8.62408 | 125.05276 | 43ValH | 43ValN |
| 8.96265 | 121.7778 | 44GluH | 44GluN | 8.99272 | 122.04012 | 44GluH | 44GluN |
| 7.6186  | 116.2857 | 45GluH | 45GluN | 7.63043 | 116.53426 | 45GluH | 45GluN |
| 8.66171 | 122.0424 | 46LeuH | 46LeuN | 8.64507 | 122.0205  | 46LeuH | 46LeuN |
| 9.15635 | 122.4511 | 47LysH | 47LysN | 9.17446 | 122.7257  | 47LysH | 47LysN |
| 8.59743 | 114.3018 | 49ThrH | 49ThrN | 8.66702 | 114.80277 | 49ThrH | 49ThrN |
| 7.52999 | 112.0727 | 51GluH | 51GluN | 7.51061 | 112.13326 | 51GluH | 51GluN |

|         |          |        |        |         |           |        |        |
|---------|----------|--------|--------|---------|-----------|--------|--------|
| 8.28883 | 107.0215 | 52GlyH | 52GlyN | 8.2869  | 107.66962 | 52GlyH | 52GlyN |
| 7.18097 | 115.1938 | 53AspH | 53AspN | 7.18685 | 116.24506 | 53AspH | 53AspN |
| 8.80694 | 119.4394 | 54LeuH | 54LeuN | 8.84793 | 119.32414 | 54LeuH | 54LeuN |
| 8.62626 | 126.0635 | 55GluH | 55GluN | 8.57733 | 125.9837  | 55GluH | 55GluN |
| 9.26173 | 126.5153 | 56IleH | 56IleN | 9.22524 | 126.13213 | 56IleH | 56IleN |
| 8.48296 | 128.6041 | 57LeuH | 57LeuN | 8.5193  | 128.69465 | 57LeuH | 57LeuN |
| 9.06596 | 123.3919 | 58LeuH | 58LeuN | 9.05892 | 123.36032 | 58LeuH | 58LeuN |
| 9.23144 | 117.7148 | 59GlnH | 59GlnN | 9.22422 | 117.78442 | 59GlnH | 59GlnN |
| 8.95487 | 121.5045 | 60LysH | 60LysN | 8.92294 | 121.5005  | 60LysH | 60LysN |
| 9.74021 | 129.856  | 61TrpH | 61TrpN |         |           | 61TrpH | 61TrpN |
| 8.74944 | 127.2512 | 62GluH | 62GluN | 8.72787 | 127.63268 | 62GluH | 62GluN |
| 8.91417 | 121.6213 | 63AsnH | 63AsnN |         |           | 63AsnH | 63AsnN |
| 8.13732 | 110.9992 | 64AspH | 64AspN | 8.11994 | 110.97099 | 64AspH | 64AspN |
| 6.75262 | 114.5227 | 65GluH | 65GluN | 6.76569 | 114.6642  | 65GluH | 65GluN |
| 8.67315 | 120.2401 | 66CysH | 66CysN | 8.58824 | 119.84009 | 66CysH | 66CysN |
| 8.97902 | 133.4899 | 67AlaH | 67AlaN | 9.00822 | 133.41585 | 67AlaH | 67AlaN |
| 8.38211 | 118.635  | 68GlnH | 68GlnN | 8.37675 | 118.73442 | 68GlnH | 68GlnN |
| 9.15043 | 123.6905 | 69LysH | 69LysN | 9.16777 | 123.52064 | 69LysH | 69LysN |
| 8.54061 | 123.6847 | 70LysH | 70LysN | 8.49975 | 123.38297 | 70LysH | 70LysN |
| 8.95827 | 124.1015 | 71IleH | 71IleN | 8.98812 | 124.57064 | 71IleH | 71IleN |
| 8.49789 | 125.4454 | 72IleH | 72IleN | 8.4856  | 125.42674 | 72IleH | 72IleN |
| 9.26399 | 133.2975 | 73AlaH | 73AlaN | 9.29059 | 133.63675 | 73AlaH | 73AlaN |
| 9.43616 | 124.5123 | 74GluH | 74GluN | 9.40332 | 124.79317 | 74GluH | 74GluN |
| 8.4843  | 123.1493 | 75LysH | 75LysN | 8.86128 | 123.56929 | 75LysH | 75LysN |
| 8.44455 | 112.5842 | 76ThrH | 76ThrN | 8.38966 | 112.48585 | 76ThrH | 76ThrN |
| 8.27246 | 116.4517 | 77LysH | 77LysN | 8.27008 | 116.36791 | 77LysH | 77LysN |
| 7.97976 | 122.2947 | 78IleH | 78IleN | 7.97952 | 122.31686 | 78IleH | 78IleN |
| 7.85116 | 115.217  | 80AlaH | 80AlaN | 7.98791 | 115.6413  | 80AlaH | 80AlaN |
| 7.28916 | 117.3683 | 81ValH | 81ValN | 7.2541  | 117.25123 | 81ValH | 81ValN |
| 9.53946 | 126.2751 | 82PheH | 82PheN | 9.56952 | 126.57629 | 82PheH | 82PheN |
| 9.48594 | 123.2371 | 83LysH | 83LysN | 9.53814 | 123.74872 | 83LysH | 83LysN |
| 7.7646  | 116.4437 | 84IleH | 84IleN | 7.75112 | 116.38482 | 84IleH | 84IleN |
| 8.79959 | 119.195  | 85AspH | 85AspN | 8.72482 | 120.01021 | 85AspH | 85AspN |
| 7.22122 | 121.9317 | 86AlaH | 86AlaN | 7.18809 | 121.90603 | 86AlaH | 86AlaN |
| 9.01196 | 114.5393 | 87LeuH | 87LeuN | 9.00004 | 114.55674 | 87LeuH | 87LeuN |
| 8.68998 | 111.244  | 88AsnH | 88AsnN | 8.71409 | 111.23332 | 88AsnH | 88AsnN |
| 8.24907 | 117.3076 | 89GluH | 89GluN | 8.27401 | 117.27395 | 89GluH | 89GluN |
| 9.10042 | 115.6569 | 90AsnH | 90AsnN | 9.08647 | 115.52173 | 90AsnH | 90AsnN |
| 8.55857 | 121.6032 | 91LysH | 91LysN | 8.5147  | 121.59359 | 91LysH | 91LysN |
| 9.05227 | 121.2037 | 92ValH | 92ValN |         |           | 92ValH | 92ValN |
| 9.42034 | 125.9924 | 93LeuH | 93LeuN | 9.44071 | 125.98654 | 93LeuH | 93LeuN |
| 9.32618 | 123.8768 | 94ValH | 94ValN | 9.28846 | 123.81946 | 94ValH | 94ValN |
| 8.45414 | 128.07   | 95LeuH | 95LeuN | 8.48537 | 128.06782 | 95LeuH | 95LeuN |
| 7.20926 | 109.8899 | 96AspH | 96AspN | 7.21482 | 110.46173 | 96AspH | 96AspN |
| 7.78325 | 118.8771 | 97ThrH | 97ThrN | 7.75403 | 119.1947  | 97ThrH | 97ThrN |

|         |          |         |         |         |           |         |         |
|---------|----------|---------|---------|---------|-----------|---------|---------|
| 6.77772 | 123.0158 | 98AspH  | 98AspN  | 6.82303 | 123.66726 | 98AspH  | 98AspN  |
| 9.0333  | 117.7347 | 99TyrH  | 99TyrN  | 9.00943 | 117.5086  | 99TyrH  | 99TyrN  |
| 9.00755 | 119.5293 | 100LysH | 100LysN | 9.00086 | 119.97522 | 100LysH | 100LysN |
| 9.15464 | 118.6572 | 101LysH | 101LysN | 9.6492  | 120.5814  | 101LysH | 101LysN |
| 8.92234 | 116.313  | 102TyrH | 102TyrN | 9.1665  | 116.88936 | 102TyrH | 102TyrN |
| 9.15925 | 125.0007 | 103LeuH | 103LeuN | 9.15791 | 124.91022 | 103LeuH | 103LeuN |
| 9.36536 | 124.9315 | 104LeuH | 104LeuN | 9.38556 | 124.80012 | 104LeuH | 104LeuN |
| 8.8884  | 121.2799 | 105PheH | 105PheN | 8.86883 | 121.31019 | 105PheH | 105PheN |
| 9.65116 | 117.241  | 106CysH | 106CysN | 9.6324  | 117.19327 | 106CysH | 106CysN |
| 9.91503 | 120.6674 | 107MetH | 107MetN | 9.94944 | 120.6503  | 107MetH | 107MetN |
| 8.39827 | 113.7012 | 108GluH | 108GluN | 8.36756 | 113.5401  | 108GluH | 108GluN |
| 9.38562 | 120.1509 | 109AsnH | 109AsnN | 9.31585 | 120.13682 | 109AsnH | 109AsnN |
| 9.80254 | 122.1423 | 110SerH | 110SerN | 9.82524 | 122.02011 | 110SerH | 110SerN |
| 8.31275 | 123.4047 | 111AlaH | 111AlaN | 8.28885 | 123.42175 | 111AlaH | 111AlaN |
| 7.74809 | 113.4934 | 112GluH | 112GluN | 7.77428 | 113.62941 | 112GluH | 112GluN |
| 8.29799 | 114.6368 | 114GluH | 114GluN | 8.51444 | 114.7389  | 114GluH | 114GluN |
| 7.80129 | 115.9036 | 115GlnH | 115GlnN |         |           | 115GlnH | 115GlnN |
| 7.55463 | 109.5774 | 116SerH | 116SerN | 7.57996 | 109.8805  | 116SerH | 116SerN |
| 7.23519 | 126.2904 | 117LeuH | 117LeuN | 7.24807 | 126.90872 | 117LeuH | 117LeuN |
| 8.81571 | 126.0732 | 118ValH | 118ValN | 8.8264  | 125.78253 | 118ValH | 118ValN |
| 9.40553 | 121.9189 | 119CysH | 119CysN | 9.5114  | 122.05082 | 119CysH | 119CysN |
| 9.34365 | 118.5203 | 120GlnH | 120GlnN | 9.32355 | 118.48955 | 120GlnH | 120GlnN |
| 7.85199 | 119.9971 | 121CysH | 121CysN |         |           | 121CysH | 121CysN |
| 9.73782 | 128.505  | 122LeuH | 122LeuN | 9.73866 | 128.56131 | 122LeuH | 122LeuN |
| 9.45469 | 111.3953 | 123ValH | 123ValN | 9.4416  | 111.54708 | 123ValH | 123ValN |
| 7.92677 | 119.6724 | 124ArgH | 124ArgN | 7.93195 | 119.76318 | 124ArgH | 124ArgN |
| 7.50602 | 108.3734 | 125ThrH | 125ThrN | 7.57508 | 108.4092  | 125ThrH | 125ThrN |
| 8.28294 | 119.9774 | 127GluH | 127GluN | 8.34175 | 120.41194 | 127GluH | 127GluN |
| 8.34333 | 119.1833 | 128ValH | 128ValN | 8.34697 | 119.25082 | 128ValH | 128ValN |
| 6.54905 | 123.9292 | 129AspH | 129AspN |         |           | 129AspH | 129AspN |
| 9.099   | 123.7389 | 130AspH | 130AspN | 8.91334 | 125.16318 | 130AspH | 130AspN |
| 8.36184 | 121.0666 | 131GluH | 131GluN | 8.32864 | 121.14207 | 131GluH | 131GluN |
| 7.59799 | 121.3508 | 132AlaH | 132AlaN | 7.8827  | 122.45506 | 132AlaH | 132AlaN |
| 7.71521 | 116.0186 | 133LeuH | 133LeuN | 7.69738 | 116.45833 | 133LeuH | 133LeuN |
| 8.03054 | 119.4525 | 134GluH | 134GluN | 8.05092 | 119.54641 | 134GluH | 134GluN |
| 7.96565 | 119.7573 | 135LysH | 135LysN |         |           | 135LysH | 135LysN |
| 8.51648 | 121.6446 | 136PheH | 136PheN | 8.51634 | 121.87362 | 136PheH | 136PheN |
| 8.74399 | 117.1587 | 137AspH | 137AspN | 8.57401 | 118.74543 | 137AspH | 137AspN |
| 7.95303 | 119.1884 | 138LysH | 138LysN | 7.95684 | 119.32023 | 138LysH | 138LysN |
| 7.82219 | 121.8021 | 139AlaH | 139AlaN | 7.85513 | 121.68615 | 139AlaH | 139AlaN |
| 7.49697 | 114.3457 | 140LeuH | 140LeuN | 7.49057 | 114.77317 | 140LeuH | 140LeuN |
| 7.15578 | 119.6065 | 141LysH | 141LysN | 7.16841 | 119.78887 | 141LysH | 141LysN |
| 7.76552 | 118.5511 | 142AlaH | 142AlaN | 7.755   | 118.53939 | 142AlaH | 142AlaN |
| 7.71446 | 119.6259 | 143LeuH | 143LeuN | 7.72371 | 119.72597 | 143LeuH | 143LeuN |
| 7.67849 | 118.0502 | 145MetH | 145MetN | 7.63753 | 118.12747 | 145MetH | 145MetN |



|         |          |         |         |         |           |             |             |
|---------|----------|---------|---------|---------|-----------|-------------|-------------|
| 8.79564 | 117.935  | 146HisH | 146HisN | 8.81493 | 117.8165  | 146HisH     | 146HisN     |
| 7.71735 | 117.3738 | 147IleH | 147IleN |         |           | 147IleH     | 147IleN     |
| 8.35305 | 126.5955 | 148ArgH | 148ArgN |         |           | 148ArgH     | 148ArgN     |
| 9.14659 | 123.9575 | 149LeuH | 149LeuN | 9.20937 | 125.01044 | 149LeuH     | 149LeuN     |
| 8.21158 | 116.3462 | 150SerH | 150SerN | 8.22909 | 116.33363 | 150SerH     | 150SerN     |
| 8.10716 | 119.4649 | 151PheH | 151PheN | 8.14169 | 119.74648 | 151PheH     | 151PheN     |
| 8.75075 | 119.3184 | 152AsnH | 152AsnN | 8.7258  | 119.25046 | 152AsnH     | 152AsnN     |
| 8.12013 | 115.1838 | 154ThrH | 154ThrN | 8.11869 | 115.19077 | 154ThrH     | 154ThrN     |
| 8.32129 | 122.2797 | 155GlnH | 155GlnN | 8.30967 | 122.34969 | 155GlnH     | 155GlnN     |
| 8.13395 | 122.2049 | 156LeuH | 156LeuN | 8.12967 | 122.20482 | 156LeuH     | 156LeuN     |
| 8.24512 | 124.5139 | 159GlnH | 159GlnN | 8.30288 | 125.02645 | 159GlnH     | 159GlnN     |
| 8.27406 | 121.4658 | 160CysH | 160CysN |         |           | 160CysH     | 160CysN     |
| 8.16857 | 120.2484 | 161HisH | 161HisN |         |           | 161HisH     | 161HisN     |
|         |          |         |         | 8.15198 | 109.00202 | {153}H[306] | {153}N[305] |
|         |          |         |         | 7.99379 | 121.15781 | {159}H[318] | {159}N[317] |
|         |          |         |         | 8.38869 | 124.6487  | {167}[340]  | {167}N[338] |
|         |          |         |         | 8.10204 | 117.50465 | {168}H[341] | {168}N[342] |
|         |          |         |         | 8.13905 | 121.24688 | {169}H[343] | {169}N[344] |

Supporting table S3) Difference between the assignment at pH 2.65 and the assignment by

Uhrínová. S et al.

| Presented BLGA assingment |              |           |           | Original peak list by Uhrínová. S et al. |              |           |           | Difference in chemical shift |                  |                   |
|---------------------------|--------------|-----------|-----------|------------------------------------------|--------------|-----------|-----------|------------------------------|------------------|-------------------|
| Position F1               | Position F2  | Assign F1 | Assign F2 | Position F1                              | Position F2  | Assign F1 | Assign F2 | delta 1H                     | delta 15N        | Delta-delta       |
| 8.714                     | 127.01       | 1AlaH     | 1AlaN     | 8.66671                                  | 18.8415<br>2 | 1AlaH     | 1AlaN     | 0.047<br>29                  | 108.16<br>85     | 21.6337<br>5      |
| 8.15643                   | 124.594<br>6 | 1AlaH     | 1AlaN     | 8.15671                                  | 124.796      | 1AlaH     | 1AlaN     | 0.000<br>28                  | -<br>0.2013<br>9 | -<br>0.04027<br>9 |
| 7.894                     | 116.98       | 2TyrH     | 2TyrN     | 7.84671                                  | 116.836      | 2TyrH     | 2TyrN     | 0.047<br>29                  | 0.1440<br>4      | 0.05537<br>4      |
| 7.97976                   | 120.012<br>5 | 3ValH     | 3ValN     | 7.93671                                  | 120.166      | 3ValH     | 3ValN     | 0.043<br>05                  | 0.1535<br>1      | 0.05287<br>6      |
| 8.06521                   | 115.783<br>8 | 4ThrH     | 4ThrN     | 8.01671                                  | 115.816      | 4ThrH     | 4ThrN     | 0.048<br>5                   | -<br>0.0321<br>8 | -<br>0.04892<br>5 |
| 8.27049                   | 123.736<br>3 | 5GlnH     | 5GlnN     | 8.19671                                  | 123.486      | 5GlnH     | 5GlnN     | 0.073<br>78                  | 0.2503<br>3      | 0.08916<br>3      |
| 7.76571                   | 111.525      | 6ThrH     | 6ThrN     | 7.70671                                  | 111.026      | 6ThrH     | 6ThrN     | 0.059                        | 0.4995           | 0.11603           |

|         |              |            |            |         |         |            |            |                  |                  |              |
|---------|--------------|------------|------------|---------|---------|------------|------------|------------------|------------------|--------------|
|         | 5            |            |            |         |         |            |            |                  | 5                |              |
| 7.74564 | 120.269<br>7 | 7MetH      | 7MetN      | 7.74771 | 120.264 | 7MetH      | 7MetN      | -<br>0.002<br>07 | 0.0057<br>8      | 0.00237<br>1 |
| 8.67298 | 127.644<br>9 | 8LysH      | 8LysN      | 8.61671 | 127.316 | 8LysH      | 8LysN      | 0.056<br>27      | 0.3289<br>6      | 0.08657<br>3 |
| 8.56641 | 109.497<br>6 | 9GlyH      | 9GlyN      | 8.56871 | 109.51  | 9GlyH      | 9GlyN      | -<br>0.002<br>3  | -<br>0.0123<br>3 | 0.00337<br>2 |
| 7.55358 | 120.103<br>5 | 10Leu<br>H | 10Leu<br>N | 7.55271 | 120.04  | 10Leu<br>H | 10Leu<br>N | 0.000<br>87      | 0.0635<br>6      | 0.01274<br>2 |
| 8.62551 | 126.753<br>7 | 11Asp<br>H | 11Asp<br>N | 8.58671 | 126.786 | 11Asp<br>H | 11Asp<br>N | 0.038<br>8       | -<br>0.0322<br>4 | 0.03933<br>2 |
| 8.87636 | 122.891      | 12IleH     | 12IleN     | 8.86971 | 122.854 | 12IleH     | 12IleN     | 0.006<br>65      | 0.0370<br>1      | 0.00995      |
| 7.96968 | 117.156<br>2 | 13Gln<br>H | 13Gln<br>N | 7.96671 | 117.145 | 13Gln<br>H | 13Gln<br>N | 0.002<br>97      | 0.0112<br>2      | 0.00372<br>2 |
| 7.21671 | 113.686      | 14Lys<br>H | 14Lys<br>N | 7.21671 | 113.686 | 14Lys<br>H | 14Lys<br>N | 0                | 0                | 0            |
| 7.39204 | 110.228<br>5 | 15Val<br>H | 15Val<br>N | 7.39071 | 110.21  | 15Val<br>H | 15Val<br>N | 0.001<br>33      | 0.0185<br>1      | 0.00393<br>4 |
| 6.80901 | 120.919<br>3 | 16Ala<br>H | 16Ala<br>N | 6.80871 | 120.877 | 16Ala<br>H | 16Ala<br>N | 0.000<br>3       | 0.0423<br>7      | 0.00847<br>9 |
| 9.18302 | 110.135<br>6 | 17Gly<br>H | 17Gly<br>N | 9.18271 | 110.115 | 17Gly<br>H | 17Gly<br>N | 0.000<br>31      | 0.0206<br>2      | 0.00413<br>6 |
| 8.39327 | 118.416<br>1 | 18Thr<br>H | 18Thr<br>N | 8.33671 | 118.116 | 18Thr<br>H | 18Thr<br>N | 0.056<br>56      | 0.3001<br>6      | 0.08248      |
| 7.4529  | 124.024      | 19Trp<br>H | 19Trp<br>N | 7.45771 | 123.997 | 19Trp<br>H | 19Trp<br>N | -<br>0.004<br>81 | 0.0270<br>1      | 0.00723<br>3 |
| 9.11053 | 112.159<br>6 | 20Tyr<br>H | 20Tyr<br>N | 9.11071 | 112.1   | 20Tyr<br>H | 20Tyr<br>N | -<br>0.000<br>18 | 0.0595<br>9      | 0.01191<br>9 |
| 9.90568 | 119.465<br>2 | 21Ser<br>H | 21Ser<br>N | 9.90271 | 119.456 | 21Ser<br>H | 21Ser<br>N | 0.002<br>97      | 0.0092<br>2      | 0.00349<br>6 |
| 7.7138  | 114.899<br>9 | 23Ala<br>H | 23Ala<br>N | 7.70871 | 114.873 | 23Ala<br>H | 23Ala<br>N | 0.005<br>09      | 0.0268<br>9      | 0.00740<br>5 |

|         |              |            |            |         |         |            |            |             |             |              |
|---------|--------------|------------|------------|---------|---------|------------|------------|-------------|-------------|--------------|
| 9.07795 | 114.806<br>8 | 24Met<br>H | 24Met<br>N | 9.07771 | 114.776 | 24Met<br>H | 24Met<br>N | 0.000<br>24 | 0.0308<br>1 | 0.00616<br>7 |
| 9.30156 | 123.466<br>7 | 25Ala<br>H | 25Ala<br>N | 9.29571 | 123.439 | 25Ala<br>H | 25Ala<br>N | 0.005<br>85 | 0.0277<br>8 | 0.00806<br>8 |
| 8.31501 | 119.741<br>7 | 26Ala<br>H | 26Ala<br>N | 8.30971 | 119.687 | 26Ala<br>H | 26Ala<br>N | 0.005<br>3  | 0.0547<br>5 | 0.01216<br>5 |
| 8.36407 | 116.245      | 27Ser<br>H | 27Ser<br>N | 8.36071 | 116.204 | 27Ser<br>H | 27Ser<br>N | 0.003<br>36 | 0.0410<br>1 | 0.00886<br>4 |
| 7.86704 | 119.730<br>9 | 28Asp<br>H | 28Asp<br>N | 7.83671 | 119.656 | 28Asp<br>H | 28Asp<br>N | 0.030<br>33 | 0.0749      | 0.03382<br>8 |
| 8.80004 | 124.285<br>6 | 29IleH     | 29IleN     | 8.79271 | 124.22  | 29IleH     | 29IleN     | 0.007<br>33 | 0.0656<br>7 | 0.01504<br>1 |
| 7.95915 | 114.179<br>9 | 30Ser<br>H | 30Ser<br>N | 7.95671 | 114.158 | 30Ser<br>H | 30Ser<br>N | 0.002<br>44 | 0.0219<br>4 | 0.00502<br>1 |
| 7.59857 | 117.040<br>7 | 31Leu<br>H | 31Leu<br>N | 7.59471 | 117.005 | 31Leu<br>H | 31Leu<br>N | 0.003<br>86 | 0.0357<br>6 | 0.00812<br>7 |
| 7.05274 | 111.205<br>4 | 32Leu<br>H | 32Leu<br>N | 7.05271 | 111.156 | 32Leu<br>H | 32Leu<br>N | 3E-05       | 0.0494<br>7 | 0.00989<br>4 |
| 7.82273 | 118.368<br>4 | 33Asp<br>H | 33Asp<br>N | 7.77671 | 118.306 | 33Asp<br>H | 33Asp<br>N | 0.046<br>02 | 0.0624<br>2 | 0.04768<br>3 |
| 7.6322  | 120.678<br>5 | 34Ala<br>H | 34Ala<br>N | 7.63271 | 120.642 | 34Ala<br>H | 34Ala<br>N | 0.000<br>51 | 0.0365<br>7 | 0.00733<br>2 |
| 9.05349 | 121.498<br>8 | 35Gln<br>H | 35Gln<br>N | 9.01671 | 121.376 | 35Gln<br>H | 35Gln<br>N | 0.036<br>78 | 0.1228<br>3 | 0.04423      |
| 7.71685 | 107.569      | 36Ser<br>H | 36Ser<br>N | 7.70971 | 107.522 | 36Ser<br>H | 36Ser<br>N | 0.007<br>14 | 0.0470<br>4 | 0.01181<br>1 |
| 7.53554 | 126.245<br>5 | 37Ala<br>H | 37Ala<br>N | 7.53471 | 126.215 | 37Ala<br>H | 37Ala<br>N | 0.000<br>83 | 0.0305<br>6 | 0.00616<br>8 |
| 7.76613 | 114.016<br>2 | 39Leu<br>H | 39Leu<br>N | 7.75571 | 113.949 | 39Leu<br>H | 39Leu<br>N | 0.010<br>42 | 0.0672<br>4 | 0.01701<br>2 |
| 7.41082 | 122.275<br>5 | 40Arg<br>H | 40Arg<br>N | 7.40971 | 122.227 | 40Arg<br>H | 40Arg<br>N | 0.001<br>11 | 0.0485<br>5 | 0.00977<br>3 |
| 6.95828 | 117          |            |            | 6.95271 | 116.975 |            |            | 0.005       | 0.0250      | 0.00749      |

|         |              |            |            |         |         |            |            |                  |             |              |
|---------|--------------|------------|------------|---------|---------|------------|------------|------------------|-------------|--------------|
|         |              | 41Val<br>H | 41Val<br>N |         |         | 41Val<br>H | 41Val<br>N | 57               | 8           | 6            |
| 8.60354 | 120.574<br>1 | 42Tyr<br>H | 42Tyr<br>N | 8.59971 | 120.572 | 42Tyr<br>H | 42Tyr<br>N | 0.003<br>83      | 0.0021<br>8 | 0.00385<br>5 |
| 8.62631 | 125.162<br>7 | 43Val<br>H | 43Val<br>N | 8.62271 | 125.123 | 43Val<br>H | 43Val<br>N | 0.003<br>6       | 0.0397<br>6 | 0.00872<br>9 |
| 8.96265 | 121.777<br>8 | 44Glu<br>H | 44Glu<br>N | 8.91671 | 121.806 | 44Glu<br>H | 44Glu<br>N | 0.045<br>94      | 0.0281<br>5 | 0.04628<br>4 |
| 7.6186  | 116.285<br>7 | 45Glu<br>H | 45Glu<br>N | 7.62071 | 116.223 | 45Glu<br>H | 45Glu<br>N | -<br>0.002<br>11 | 0.0627<br>2 | 0.01272      |
| 8.66171 | 122.042<br>4 | 46Leu<br>H | 46Leu<br>N | 8.66171 | 122.004 | 46Leu<br>H | 46Leu<br>N | 0                | 0.0384<br>6 | 0.00769<br>2 |
| 9.15635 | 122.451<br>1 | 47Lys<br>H | 47Lys<br>N | 9.15771 | 122.424 | 47Lys<br>H | 47Lys<br>N | -<br>0.001<br>36 | 0.0271<br>3 | 0.00559<br>4 |
| 8.59743 | 114.301<br>8 | 49Thr<br>H | 49Thr<br>N | 8.60071 | 114.288 | 49Thr<br>H | 49Thr<br>N | -<br>0.003<br>28 | 0.0138<br>6 | 0.00429<br>4 |
| 7.52999 | 112.072<br>7 | 51Glu<br>H | 51Glu<br>N | 7.49671 | 112.086 | 51Glu<br>H | 51Glu<br>N | 0.033<br>28      | -<br>0.0133 | 0.03338<br>6 |
| 8.28883 | 107.021<br>5 | 52Gly<br>H | 52Gly<br>N | 8.28071 | 106.994 | 52Gly<br>H | 52Gly<br>N | 0.008<br>12      | 0.0275<br>1 | 0.00980<br>8 |
| 7.18097 | 115.193<br>8 | 53Asp<br>H | 53Asp<br>N | 7.17571 | 115.13  | 53Asp<br>H | 53Asp<br>N | 0.005<br>26      | 0.0638<br>1 | 0.01380<br>3 |
| 8.80694 | 119.439<br>4 | 54Leu<br>H | 54Leu<br>N | 8.79671 | 119.287 | 54Leu<br>H | 54Leu<br>N | 0.010<br>23      | 0.1523<br>9 | 0.03214<br>9 |
| 8.62626 | 126.063<br>5 | 55Glu<br>H | 55Glu<br>N | 8.62671 | 125.876 | 55Glu<br>H | 55Glu<br>N | -<br>0.000<br>45 | 0.1875<br>7 | 0.03751<br>7 |
| 9.26173 | 126.515<br>3 | 56IleH     | 56IleN     | 9.25971 | 126.498 | 56IleH     | 56IleN     | 0.002<br>02      | 0.0173<br>7 | 0.00401<br>9 |
| 8.48296 | 128.604<br>1 | 57Leu<br>H | 57Leu<br>N | 8.48571 | 128.546 | 57Leu<br>H | 57Leu<br>N | -<br>0.002<br>75 | 0.0581<br>3 | 0.01194<br>7 |
| 9.06596 | 123.391<br>9 | 58Leu<br>H | 58Leu<br>N | 9.06671 | 123.367 | 58Leu<br>H | 58Leu<br>N | -<br>0.000<br>75 | 0.0249<br>8 | 0.00505<br>2 |
| 9.23144 | 117.714<br>8 | 59Gln      | 59Gln      | 9.22371 | 117.655 | 59Gln      | 59Gln      | 0.007<br>73      | 0.0598<br>3 | 0.01424<br>6 |

|         |              | H          | N          |         |         | H          | N          |             |             |              |
|---------|--------------|------------|------------|---------|---------|------------|------------|-------------|-------------|--------------|
| 8.95487 | 121.504<br>5 | 60Lys<br>H | 60Lys<br>N | 8.91671 | 121.496 | 60Lys<br>H | 60Lys<br>N | 0.038<br>16 | 0.0085      | 0.03819<br>8 |
| 9.74021 | 129.856      | 61Trp<br>H | 61Trp<br>N | 9.73471 | 129.762 | 61Trp<br>H | 61Trp<br>N | 0.005<br>5  | 0.0940<br>4 | 0.01959<br>6 |
| 8.74944 | 127.251<br>2 | 62Glu<br>H | 62Glu<br>N | 8.67671 | 127.376 | 62Glu<br>H | 62Glu<br>N | 0.072<br>73 | 0.1247<br>6 | 0.07689<br>1 |
| 8.91417 | 121.621<br>3 | 63Asn<br>H | 63Asn<br>N | 8.86671 | 121.476 | 63Asn<br>H | 63Asn<br>N | 0.047<br>46 | 0.1453<br>8 | 0.05565<br>8 |
| 8.13732 | 110.999<br>2 | 64Asp<br>H | 64Asp<br>N | 8.13871 | 110.966 | 64Asp<br>H | 64Asp<br>N | 0.001<br>39 | 0.0332<br>6 | 0.00679<br>6 |
| 6.75262 | 114.522<br>7 | 65Glu<br>H | 65Glu<br>N | 6.75071 | 114.489 | 65Glu<br>H | 65Glu<br>N | 0.001<br>91 | 0.0337<br>5 | 0.00701<br>5 |
| 8.67315 | 120.240<br>1 | 66Cys<br>H | 66Cys<br>N | 8.66571 | 120.173 | 66Cys<br>H | 66Cys<br>N | 0.007<br>44 | 0.0671<br>5 | 0.01535<br>3 |
| 8.97902 | 133.489<br>9 | 67Ala<br>H | 67Ala<br>N | 8.97871 | 133.464 | 67Ala<br>H | 67Ala<br>N | 0.000<br>31 | 0.0259      | 0.00518<br>9 |
| 8.38211 | 118.635      | 68Gln<br>H | 68Gln<br>N | 8.34671 | 118.636 | 68Gln<br>H | 68Gln<br>N | 0.035<br>4  | 0.0009<br>6 | 0.03540<br>1 |
| 9.15043 | 123.690<br>5 | 69Lys<br>H | 69Lys<br>N | 9.14771 | 123.65  | 69Lys<br>H | 69Lys<br>N | 0.002<br>72 | 0.0405<br>1 | 0.00854<br>6 |
| 8.54061 | 123.684<br>7 | 70Lys<br>H | 70Lys<br>N | 8.53471 | 123.623 | 70Lys<br>H | 70Lys<br>N | 0.005<br>9  | 0.0617<br>5 | 0.01368<br>7 |
| 8.95827 | 124.101<br>5 | 71IleH     | 71IleN     | 8.95371 | 124.008 | 71IleH     | 71IleN     | 0.004<br>56 | 0.0935<br>3 | 0.01925<br>4 |
| 8.49789 | 125.445<br>4 | 72IleH     | 72IleN     | 8.49371 | 125.402 | 72IleH     | 72IleN     | 0.004<br>18 | 0.0433<br>9 | 0.00963<br>2 |
| 9.26399 | 133.297<br>5 | 73Ala<br>H | 73Ala<br>N | 9.25771 | 133.246 | 73Ala<br>H | 73Ala<br>N | 0.006<br>28 | 0.0515<br>3 | 0.01206<br>9 |
| 9.43616 | 124.512<br>3 | 74Glu<br>H | 74Glu<br>N | 9.42871 | 124.432 | 74Glu<br>H | 74Glu<br>N | 0.007<br>45 | 0.0803<br>1 | 0.01770<br>6 |
| 8.4843  | 123.149<br>3 | 75Lys<br>H | 75Lys<br>N | 8.48471 | 123.032 | 75Lys<br>H | 75Lys<br>N | 0.000<br>41 | 0.1173<br>3 | 0.02347      |

|         |              |            |            |         |         |            |            |             |                  |              |
|---------|--------------|------------|------------|---------|---------|------------|------------|-------------|------------------|--------------|
| 8.44455 | 112.584<br>2 | 76Thr<br>H | 76Thr<br>N | 8.43871 | 112.528 | 76Thr<br>H | 76Thr<br>N | 0.005<br>84 | 0.0562<br>7      | 0.01267<br>9 |
| 8.27246 | 116.451<br>7 | 77Lys<br>H | 77Lys<br>N | 8.21671 | 116.306 | 77Lys<br>H | 77Lys<br>N | 0.055<br>75 | 0.1457           | 0.06290<br>6 |
| 7.97976 | 122.294<br>7 | 78IleH     | 78IleN     | 7.97671 | 122.156 | 78IleH     | 78IleN     | 0.003<br>05 | 0.1387           | 0.02790<br>7 |
| 7.85116 | 115.217      | 80Ala<br>H | 80Ala<br>N | 7.83971 | 115.155 | 80Ala<br>H | 80Ala<br>N | 0.011<br>45 | 0.0620<br>1      | 0.01687<br>9 |
| 7.28916 | 117.368<br>3 | 81Val<br>H | 81Val<br>N | 7.29071 | 117.327 | 81Val<br>H | 81Val<br>N | -<br>55     | 0.0413<br>6      | 0.00841<br>6 |
| 9.53946 | 126.275<br>1 | 82Phe<br>H | 82Phe<br>N | 9.53171 | 126.222 | 82Phe<br>H | 82Phe<br>N | 0.007<br>75 | 0.0531<br>4      | 0.01315<br>4 |
| 9.48594 | 123.237<br>1 | 83Lys<br>H | 83Lys<br>N | 9.48371 | 123.137 | 83Lys<br>H | 83Lys<br>N | 0.002<br>23 | 0.1001<br>2      | 0.02014<br>8 |
| 7.7646  | 116.443<br>7 | 84IleH     | 84IleN     | 7.72671 | 116.283 | 84IleH     | 84IleN     | 0.037<br>89 | 0.1607<br>1      | 0.04968<br>7 |
| 8.79959 | 119.195      | 85Asp<br>H | 85Asp<br>N | 8.79471 | 119.212 | 85Asp<br>H | 85Asp<br>N | 0.004<br>88 | -<br>0.0169<br>2 | 0.00593<br>9 |
| 7.22122 | 121.931<br>7 | 86Ala<br>H | 86Ala<br>N | 7.21771 | 121.909 | 86Ala<br>H | 86Ala<br>N | 0.003<br>51 | 0.0227<br>4      | 0.00574<br>5 |
| 9.01196 | 114.539<br>3 | 87Leu<br>H | 87Leu<br>N | 9.00271 | 114.586 | 87Leu<br>H | 87Leu<br>N | 0.009<br>25 | -<br>0.0466<br>7 | 0.01314<br>1 |
| 8.68998 | 111.244      | 88Asn<br>H | 88Asn<br>N | 8.68071 | 111.222 | 88Asn<br>H | 88Asn<br>N | 0.009<br>27 | 0.0220<br>5      | 0.01026<br>6 |
| 8.24907 | 117.307<br>6 | 89Glu<br>H | 89Glu<br>N | 8.22671 | 117.226 | 89Glu<br>H | 89Glu<br>N | 0.022<br>36 | 0.0816<br>4      | 0.02768<br>7 |
| 9.10042 | 115.656<br>9 | 90Asn<br>H | 90Asn<br>N | 9.09471 | 115.64  | 90Asn<br>H | 90Asn<br>N | 0.005<br>71 | 0.0169<br>6      | 0.00664<br>2 |
| 8.55857 | 121.603<br>2 | 91Lys<br>H | 91Lys<br>N | 8.55671 | 121.486 | 91Lys<br>H | 91Lys<br>N | 0.001<br>86 | 0.1172<br>1      | 0.02351<br>6 |
| 9.05227 | 121.203<br>7 | 92Val<br>H | 92Val<br>N | 9.00671 | 121.296 | 92Val<br>H | 92Val<br>N | 0.045<br>56 | -<br>0.0922<br>9 | 0.04915<br>7 |
| 9.42034 | 125.992<br>4 | 93Leu      | 93Leu      | 9.42171 | 125.949 | 93Leu      | 93Leu      | -<br>0.001  | 0.0434<br>6      | 0.00879<br>9 |

|         |              | H           | N           |         |         | H           | N           | 37          |             |              |
|---------|--------------|-------------|-------------|---------|---------|-------------|-------------|-------------|-------------|--------------|
| 9.32618 | 123.876<br>8 | 94Val<br>H  | 94Val<br>N  | 9.32071 | 123.826 | 94Val<br>H  | 94Val<br>N  | 0.005<br>47 | 0.0508<br>5 | 0.01154<br>8 |
| 8.45414 | 128.07       | 95Leu<br>H  | 95Leu<br>N  | 8.45471 | 128.055 | 95Leu<br>H  | 95Leu<br>N  | -<br>57     | 0.0150<br>7 | 0.00306<br>7 |
| 7.20926 | 109.889<br>9 | 96Asp<br>H  | 96Asp<br>N  | 7.20571 | 109.887 | 96Asp<br>H  | 96Asp<br>N  | 0.003<br>55 | 0.0029<br>8 | 0.0036       |
| 7.78325 | 118.877<br>1 | 97Thr<br>H  | 97Thr<br>N  | 7.75671 | 118.816 | 97Thr<br>H  | 97Thr<br>N  | 0.026<br>54 | 0.0611<br>8 | 0.02922<br>5 |
| 6.77772 | 123.015<br>8 | 98Asp<br>H  | 98Asp<br>N  | 6.78371 | 123.026 | 98Asp<br>H  | 98Asp<br>N  | -<br>99     | -<br>5      | 0.00632<br>5 |
| 9.0333  | 117.734<br>7 | 99Tyr<br>H  | 99Tyr<br>N  | 9.02871 | 117.67  | 99Tyr<br>H  | 99Tyr<br>N  | 0.004<br>59 | 0.0647<br>5 | 0.01373<br>9 |
| 9.00755 | 119.529<br>3 | 100Lys<br>H | 100Lys<br>N | 9.00471 | 119.499 | 100Lys<br>H | 100Lys<br>N | 0.002<br>84 | 0.0303<br>4 | 0.0067       |
| 9.15464 | 118.657<br>2 | 101Lys<br>H | 101Lys<br>N | 9.17471 | 118.672 | 101Lys<br>H | 101Lys<br>N | -<br>07     | -<br>4      | 0.02028<br>5 |
| 8.92234 | 116.313      | 102Tyr<br>H | 102Tyr<br>N | 8.93171 | 116.264 | 102Tyr<br>H | 102Tyr<br>N | -<br>37     | -<br>4      | 0.01356<br>4 |
| 9.15925 | 125.000<br>7 | 103Le<br>uH | 103Le<br>uN | 9.15671 | 124.966 | 103Le<br>uH | 103Le<br>uN | 0.002<br>54 | 0.0347<br>5 | 0.0074       |
| 9.36536 | 124.931<br>5 | 104Le<br>uH | 104Le<br>uN | 9.36271 | 124.899 | 104Le<br>uH | 104Le<br>uN | 0.002<br>65 | 0.0325      | 0.00701<br>9 |
| 8.8884  | 121.279<br>9 | 105Phe<br>H | 105Phe<br>N | 8.86671 | 121.216 | 105Phe<br>H | 105Phe<br>N | 0.021<br>69 | 0.0639<br>1 | 0.02517<br>6 |
| 9.65116 | 117.241      | 106Cy<br>sH | 106Cy<br>sN | 9.64471 | 117.185 | 106Cy<br>sH | 106Cy<br>sN | 0.006<br>45 | 0.056       | 0.01292<br>4 |
| 9.91503 | 120.667<br>4 | 107Me<br>tH | 107Me<br>tN | 9.91471 | 120.639 | 107Me<br>tH | 107Me<br>tN | 0.000<br>32 | 0.0284<br>6 | 0.00570<br>1 |
| 8.39827 | 113.701<br>2 | 108Glu<br>H | 108Glu<br>N | 8.39871 | 113.701 | 108Glu<br>H | 108Glu<br>N | -<br>44     | -<br>3      | 0.00044<br>2 |
| 9.38562 | 120.150<br>9 | 109As       | 109As       | 9.37971 | 120.102 | 109As       | 109As       | 0.005<br>91 | 0.0489<br>1 | 0.01142<br>9 |

|         |              | nH          | nN          |         |         | nH          | nN          |             |             |              |
|---------|--------------|-------------|-------------|---------|---------|-------------|-------------|-------------|-------------|--------------|
| 9.80254 | 122.142<br>3 | 110Ser<br>H | 110Ser<br>N | 9.79871 | 122.111 | 110Ser<br>H | 110Ser<br>N | 0.003<br>83 | 0.0313<br>3 | 0.00734<br>4 |
| 8.31275 | 123.404<br>7 | 111Ala<br>H | 111Ala<br>N | 8.28671 | 123.226 | 111Ala<br>H | 111Ala<br>N | 0.026<br>04 | 0.1787<br>4 | 0.04422<br>7 |
| 7.74809 | 113.493<br>4 | 112Glu<br>H | 112Glu<br>N | 7.74071 | 113.434 | 112Glu<br>H | 112Glu<br>N | 0.007<br>38 | 0.0594<br>1 | 0.01398<br>7 |
| 8.29799 | 114.636<br>8 | 114Glu<br>H | 114Glu<br>N | 8.29471 | 114.629 | 114Glu<br>H | 114Glu<br>N | 0.003<br>28 | 0.0078<br>3 | 0.00363<br>5 |
| 7.80129 | 115.903<br>6 | 115Gln<br>H | 115Gln<br>N | 7.75671 | 115.736 | 115Gln<br>H | 115Gln<br>N | 0.044<br>58 | 0.1676<br>6 | 0.05578<br>3 |
| 7.55463 | 109.577<br>4 | 116Ser<br>H | 116Ser<br>N | 7.55771 | 109.554 | 116Ser<br>H | 116Ser<br>N | -<br>08     | 0.0234<br>2 | 0.00560<br>6 |
| 7.23519 | 126.290<br>4 | 117Le<br>uH | 117Le<br>uN | 7.23071 | 126.251 | 117Le<br>uH | 117Le<br>uN | 0.004<br>48 | 0.0393<br>9 | 0.00906<br>3 |
| 8.81571 | 126.073<br>2 | 118Val<br>H | 118Val<br>N | 8.80571 | 126.07  | 118Val<br>H | 118Val<br>N | 0.01        | 0.0032<br>7 | 0.01002<br>1 |
| 9.40553 | 121.918<br>9 | 119Cy<br>sH | 119Cy<br>sN | 9.40371 | 121.903 | 119Cy<br>sH | 119Cy<br>sN | 0.001<br>82 | 0.0159<br>1 | 0.00366<br>6 |
| 9.34365 | 118.520<br>3 | 120Gln<br>H | 120Gln<br>N | 9.32671 | 118.446 | 120Gln<br>H | 120Gln<br>N | 0.016<br>94 | 0.0743<br>6 | 0.02254<br>2 |
| 7.85199 | 119.997<br>1 | 121Cy<br>sH | 121Cy<br>sN | 7.84671 | 120.076 | 121Cy<br>sH | 121Cy<br>sN | 0.005<br>28 | 0.0788<br>9 | 0.01663<br>8 |
| 9.73782 | 128.505      | 122Le<br>uH | 122Le<br>uN | 9.73771 | 128.487 | 122Le<br>uH | 122Le<br>uN | 0.000<br>11 | 0.0180<br>2 | 0.00360<br>6 |
| 9.45469 | 111.395<br>3 | 123Val<br>H | 123Val<br>N | 9.45371 | 111.378 | 123Val<br>H | 123Val<br>N | 0.000<br>98 | 0.0173<br>3 | 0.00360<br>2 |
| 7.92677 | 119.672<br>4 | 124Ar<br>gH | 124Ar<br>gN | 7.90671 | 119.556 | 124Ar<br>gH | 124Ar<br>gN | 0.020<br>06 | 0.1164<br>4 | 0.03073<br>7 |
| 7.50602 | 108.373<br>4 | 125Thr<br>H | 125Thr<br>N | 7.50771 | 108.354 | 125Thr<br>H | 125Thr<br>N | -<br>69     | 0.0194<br>8 | 0.00424<br>7 |
| 8.28294 | 119.977<br>4 | 127Glu      | 127Glu      | 8.25671 | 119.856 | 127Glu      | 127Glu      | 0.026<br>23 | 0.1214<br>2 | 0.03574<br>5 |



|         |              | H           | N           |         |         | H           | N           |             |             |              |
|---------|--------------|-------------|-------------|---------|---------|-------------|-------------|-------------|-------------|--------------|
| 8.34333 | 119.183<br>3 | 128Val<br>H | 128Val<br>N | 8.30671 | 118.956 | 128Val<br>H | 128Val<br>N | 0.036<br>62 | 0.2273<br>1 | 0.05837<br>7 |
| 6.54905 | 123.929<br>2 | 129As<br>pH | 129As<br>pN | 6.54971 | 123.869 | 129As<br>pH | 129As<br>pN | -<br>66     | 0.0602<br>4 | 0.01206<br>6 |
| 9.099   | 123.738<br>9 | 130As<br>pH | 130As<br>pN | 9.08971 | 123.691 | 130As<br>pH | 130As<br>pN | 0.009<br>29 | 0.0479<br>4 | 0.01335      |
| 8.36184 | 121.066<br>6 | 131Glu<br>H | 131Glu<br>N | 8.32671 | 120.876 | 131Glu<br>H | 131Glu<br>N | 0.035<br>13 | 0.1906<br>4 | 0.05184<br>5 |
| 7.59799 | 121.350<br>8 | 132Ala<br>H | 132Ala<br>N | 7.59871 | 121.317 | 132Ala<br>H | 132Ala<br>N | 0.000<br>72 | 0.0338<br>3 | 0.00680<br>4 |
| 7.71521 | 116.018<br>6 | 133Le<br>uH | 133Le<br>uN | 7.72671 | 116.256 | 133Le<br>uH | 133Le<br>uN | -<br>5      | -<br>3      | 0.04883<br>9 |
| 8.03054 | 119.452<br>5 | 134Glu<br>H | 134Glu<br>N | 8.01671 | 119.626 | 134Glu<br>H | 134Glu<br>N | 0.013<br>83 | 0.1734<br>6 | 0.03734<br>7 |
| 7.96565 | 119.757<br>3 | 135Lys<br>H | 135Lys<br>N | 7.91671 | 119.616 | 135Lys<br>H | 135Lys<br>N | 0.048<br>94 | 0.1412<br>9 | 0.05651<br>2 |
| 8.51648 | 121.644<br>6 | 136Phe<br>H | 136Phe<br>N | 8.51671 | 121.446 | 136Phe<br>H | 136Phe<br>N | -<br>23     | 0.1985<br>9 | 0.03971<br>9 |
| 8.74399 | 117.158<br>7 | 137As<br>pH | 137As<br>pN | 8.74171 | 117.114 | 137As<br>pH | 137As<br>pN | 0.002<br>28 | 0.0447<br>7 | 0.00924      |
| 7.95303 | 119.188<br>4 | 138Lys<br>H | 138Lys<br>N | 7.90671 | 119.366 | 138Lys<br>H | 138Lys<br>N | 0.046<br>32 | 0.1775<br>3 | 0.05836<br>3 |
| 7.82219 | 121.802<br>1 | 139Ala<br>H | 139Ala<br>N | 7.81871 | 121.75  | 139Ala<br>H | 139Ala<br>N | 0.003<br>48 | 0.0521<br>6 | 0.01099<br>7 |
| 7.49697 | 114.345<br>7 | 140Le<br>uH | 140Le<br>uN | 7.49171 | 114.282 | 140Le<br>uH | 140Le<br>uN | 0.005<br>26 | 0.0637      | 0.01378<br>3 |
| 7.15578 | 119.606<br>5 | 141Lys<br>H | 141Lys<br>N | 7.15371 | 119.582 | 141Lys<br>H | 141Lys<br>N | 0.002<br>07 | 0.0245<br>8 | 0.00533<br>4 |
| 7.76552 | 118.551<br>1 | 142Ala<br>H | 142Ala<br>N | 7.77671 | 118.306 | 142Ala<br>H | 142Ala<br>N | -<br>19     | 0.2451<br>2 | 0.05028<br>5 |
| 7.71446 | 119.625<br>9 | 143Le       | 143Le       | 7.71171 | 119.606 | 143Le       | 143Le       | 0.002<br>75 | 0.0198<br>9 | 0.00483<br>6 |

|         |              | uH          | uN          |         |         | uH          | uN          |             |             |              |
|---------|--------------|-------------|-------------|---------|---------|-------------|-------------|-------------|-------------|--------------|
| 7.67849 | 118.050<br>2 | 145Me<br>tH | 145Me<br>tN | 7.67171 | 118.024 | 145Me<br>tH | 145Me<br>tN | 0.006<br>78 | 0.0262<br>5 | 0.00857<br>5 |
| 8.79564 | 117.935      | 146His<br>H | 146His<br>N | 8.78971 | 117.917 | 146His<br>H | 146His<br>N | 0.005<br>93 | 0.0180<br>6 | 0.00694<br>3 |
| 7.71735 | 117.373<br>8 | 147Ile<br>H | 147Ile<br>N | 7.71471 | 117.335 | 147Ile<br>H | 147Ile<br>N | 0.002<br>64 | 0.0388<br>3 | 0.00820<br>2 |
| 8.35305 | 126.595<br>5 | 148Ar<br>gH | 148Ar<br>gN | 8.34471 | 126.557 | 148Ar<br>gH | 148Ar<br>gN | 0.008<br>34 | 0.0385<br>3 | 0.01135<br>5 |
| 9.14659 | 123.957<br>5 | 149Le<br>uH | 149Le<br>uN | 9.14471 | 123.935 | 149Le<br>uH | 149Le<br>uN | 0.001<br>88 | 0.0225<br>7 | 0.00489      |
| 8.21158 | 116.346<br>2 | 150Ser<br>H | 150Ser<br>N | 8.16671 | 116.306 | 150Ser<br>H | 150Ser<br>N | 0.044<br>87 | 0.0401<br>9 | 0.04558<br>4 |
| 8.10716 | 119.464<br>9 | 151Phe<br>H | 151Phe<br>N | 8.05671 | 119.806 | 151Phe<br>H | 151Phe<br>N | 0.050<br>45 | 0.3410<br>4 | 0.08483<br>8 |
| 8.75075 | 119.318<br>4 | 152As<br>nH | 152As<br>nN | 8.74671 | 119.306 | 152As<br>nH | 152As<br>nN | 0.004<br>04 | 0.0124<br>5 | 0.00474<br>6 |
| 8.12013 | 115.183<br>8 | 154Thr<br>H | 154Thr<br>N | 8.11671 | 115.566 | 154Thr<br>H | 154Thr<br>N | 0.003<br>42 | 0.3821<br>8 | 0.07651<br>2 |
| 8.32129 | 122.279<br>7 | 155Gln<br>H | 155Gln<br>N | 8.31171 | 122.264 | 155Gln<br>H | 155Gln<br>N | 0.009<br>58 | 0.0157<br>8 | 0.01008<br>6 |
| 8.13395 | 122.204<br>9 | 156Le<br>uH | 156Le<br>uN | 8.17671 | 122.466 | 156Le<br>uH | 156Le<br>uN | 0.042<br>76 | 0.2610<br>3 | 0.06748<br>2 |
| 8.24512 | 124.513<br>9 | 159Gln<br>H | 159Gln<br>N | 8.23671 | 124.826 | 159Gln<br>H | 159Gln<br>N | 0.008<br>41 | 0.3120<br>9 | 0.06298<br>2 |
| 8.27406 | 121.465<br>8 | 160Cy<br>sH | 160Cy<br>sN | 8.22671 | 121.306 | 160Cy<br>sH | 160Cy<br>sN | 0.047<br>35 | 0.1597<br>9 | 0.05712<br>6 |
| 8.16857 | 120.248<br>4 | 161His<br>H | 161His<br>N | 8.13671 | 119.896 | 161His<br>H | 161His<br>N | 0.031<br>86 | 0.3524<br>7 | 0.07735<br>9 |

Supporting Table S4. Unassigned residues and residues with peaks disappearing during pH titration to pH 4.0.

| Unassigned residues | Residues with disappearing NMR signal during pH titration | Titration step for disappearing NMR signal |             |
|---------------------|-----------------------------------------------------------|--------------------------------------------|-------------|
| Y2                  | 38Pro                                                     | A26                                        | 3.20 → 4.00 |
| L22                 | 48Pro                                                     | S27                                        | 3.20 → 4.00 |
| N63                 | 50Pro                                                     | I29                                        | 3.20 → 4.00 |
| D129                | 79Pro                                                     | S30                                        | 2.65 → 3.20 |
| K135                | 113Pro                                                    | L32                                        | 2.65 → 3.20 |
| E157                | 126Pro                                                    | D33                                        | 3.20 → 4.00 |
| E158                | 144Pro                                                    | A34                                        | 3.20 → 4.00 |
| C160                | 153Pro                                                    | W61                                        | 3.20 → 4.00 |
| I162                |                                                           | V92                                        | 3.20 → 4.00 |
|                     |                                                           | Q115                                       | 3.20 → 4.00 |
|                     |                                                           | C121                                       | 3.20 → 4.00 |
|                     |                                                           | D129                                       | 2.65 → 3.20 |
|                     |                                                           | I147                                       | 3.20 → 4.00 |
|                     |                                                           | R148                                       | 3.20 → 4.00 |
|                     |                                                           | H161                                       | 3.20 → 4.00 |
